# Supplementary material for: Response: Commentary: Data processing thresholds for abundance and sparsity and missed biological insights in an untargeted chemical analysis of blood specimens for exposomics
Source: Front Public Health. 2022 Oct 18;10:1003148. doi: 10.3389/fpubh.2022.1003148 (PMC9622927; doi:10.3389/fpubh.2022.1003148)
Supplement: Supplementary file 1 [file Table_1.XLSX]

## Sheet: Sheet1
Alignment ID	Average Rt(min)	Average Mz	Fill %	S/N average	raw pvalue	spearman cofficient	adj_pvalur (FDR)	Coverage in the original peak list of MTBLS1684; 0= not found
47840	3.664	549.163	0.242	4.3	3.11692e-12	0.305403	1.97591e-07	0
43074	3.663	487.194	0.355	5.42	2.2526e-11	0.293539	7.13995e-07	0
45571	3.665	518.123	0.106	5.47	9.10631e-11	0.284817	1.92425e-06	0
36923	5.566	416.337	0.948	8.89	1.51733e-10	-0.281552	2.05398e-06	0
36574	5.751	412.304	0.497	10.43	1.62004e-10	-0.28113	2.05398e-06	1
35725	8.868	402.767	1	28.67	3.32169e-10	-0.276458	3.07543e-06	0
58056	8.866	788.561	0.882	37.75	3.61375e-10	-0.275903	3.07543e-06	1
42665	3.655	482.239	0.906	17.95	3.8811e-10	0.275433	3.07543e-06	1
38049	3.662	429.191	0.094	4.51	8.24822e-10	0.270409	5.46075e-06	0
23655	4.834	289.216	0.846	18.1	8.61412e-10	0.270116	5.46075e-06	1
57493	9.05	766.574	0.467	18.01	1.25309e-09	-0.267576	7.22158e-06	0
30594	4.704	351.533	0.659	6.13	2.26734e-09	0.263502	1.19778e-05	0
35023	8.87	394.777	0.752	7.07	2.81419e-09	-0.262001	1.37231e-05	0
27754	4.703	326.538	0.844	6.91	4.21832e-09	0.259162	1.78787e-05	0
40536	5.702	456.332	0.084	7.17	4.23044e-09	-0.259142	1.78787e-05	0
34591	4.225	390.21	0.106	8.74	4.75008e-09	0.258323	1.84876e-05	0
36138	8.399	407.766	0.659	5.4	5.0708e-09	-0.25786	1.84876e-05	0
57759	8.402	776.579	0.928	7.4	5.24944e-09	-0.257614	1.84876e-05	0
32305	5.796	367.157	0.006	4.03	5.64004e-09	0.257104	1.88179e-05	0
6227	0.613	144.125	0.01	11.16	6.26767e-09	-0.256352	1.98663e-05	0
23434	0.813	287.245	0.014	4.44	8.31091e-09	-0.254328	2.38013e-05	0
34619	0.599	390.346	0.277	4.82	8.39314e-09	-0.254257	2.38013e-05	0
34262	8.961	386.764	1	20.91	8.6355e-09	-0.254052	2.38013e-05	1
57494	8.863	766.577	1	135.05	9.27596e-09	-0.253536	2.45013e-05	0
34152	9.078	385.348	1	49.44	1.09855e-08	-0.25231	2.78561e-05	1
48960	4.704	567.123	0.77	12.72	1.31623e-08	0.250993	3.20921e-05	0
49866	4.704	582.088	0.956	15.06	1.42962e-08	0.250389	3.35659e-05	0
57229	8.961	756.553	0.948	19.99	1.64515e-08	-0.249358	3.72467e-05	0
29529	4.705	342.548	0.9	14.82	1.8145e-08	0.248636	3.88104e-05	0
41108	5.648	463.234	0.659	14.03	1.83666e-08	0.248547	3.88104e-05	1
42069	4.846	475.131	0.012	7.64	2.73504e-08	0.245588	5.59299e-05	0
41249	5.307	464.627	0.309	14.33	2.91481e-08	0.245112	5.77434e-05	0
21778	3.828	274.056	0.008	5.28	3.2431e-08	-0.244311	6.22999e-05	0
56651	8.962	734.571	1	60.76	3.95313e-08	-0.242817	7.37061e-05	1
27923	4.71	328.04	0.038	3.11	4.44618e-08	0.241925	8.05304e-05	0
23435	0.606	287.246	0.992	31.92	4.93188e-08	-0.241136	8.68463e-05	1
47902	4.703	550.062	0.637	6.6	5.79625e-08	0.239902	9.49555e-05	0
36945	9.466	416.783	0.01	8.85	5.81314e-08	-0.239879	9.49555e-05	0
42654	4.704	482.151	0.876	11.12	5.84175e-08	0.239842	9.49555e-05	0
26059	4.705	310.522	0.92	10.06	6.3282e-08	0.239227	0.000100291	0
40298	8.958	453.812	0.156	3.62	6.82106e-08	-0.23865	0.000104824	0
43525	6.279	492.368	0.016	3.89	6.96237e-08	-0.238492	0.000104824	0
50179	4.7	587.098	0.529	3.56	7.1103e-08	0.238329	0.000104824	0
21498	4.838	271.206	0.058	6.69	7.36499e-08	0.238058	0.000105138	0
31308	3.831	358.055	0.529	6.15	7.46331e-08	-0.237955	0.000105138	0
43056	4.703	487.108	0.778	14.54	7.86198e-08	0.237552	0.000108347	0
44383	5.311	503.138	0.034	9.72	8.5075e-08	0.23694	0.000114748	0
36126	9.076	407.33	0.998	34.21	1.03204e-07	-0.235434	0.0001363	1
46805	4.704	535.098	0.565	6.77	1.05887e-07	0.235233	0.000136989	0
12648	4.739	200.129	0.146	7.89	1.08746e-07	0.235025	0.000137875	0
29726	5.497	344.281	0.058	9.54	1.38771e-07	0.233106	0.000171374	0
50049	4.701	585.096	0.595	7.08	1.40575e-07	0.233004	0.000171374	0
49944	2.941	583.114	0.18	2.78	1.6598e-07	0.231687	0.000198528	0
49482	5.311	576.113	0.802	8.33	1.69708e-07	0.23151	0.000199228	0
48825	5.731	565.196	0.345	9.22	1.86998e-07	0.230736	0.000215534	0
37283	8.631	420.253	0.655	9.8	2.04209e-07	-0.230032	0.000231169	0
10140	2.924	178.048	0.002	2.26	2.81619e-07	-0.227441	0.000313204	0
7299	2.922	154.049	0.004	2.81	3.07229e-07	-0.226734	0.000333968	0
41720	5.311	471.111	0.978	38.77	3.12286e-07	0.226601	0.000333968	0
44871	4.705	509.089	0.158	4.66	3.18648e-07	0.226436	0.000333968	0
41826	5.31	472.111	0.022	17.39	3.21361e-07	0.226367	0.000333968	0
15932	3.83	228.064	0.92	18.65	3.40561e-07	-0.225894	0.000348213	1
58323	8.4	798.559	0.04	5.32	3.74254e-07	-0.225122	0.000376589	0
44464	5.311	503.316	0.992	92.65	4.16322e-07	0.224247	0.000406994	1
43171	4.244	488.177	0.044	8.6	4.17311e-07	0.224228	0.000406994	0
35000	5.846	394.296	0.904	17.21	4.29e-07	-0.224	0.000412055	1
41660	5.189	470.107	0.08	31	4.43524e-07	0.223726	0.000419646	0
13337	3.83	206.082	1	120.95	4.97999e-07	-0.222768	0.000458114	1
41659	5.311	470.107	0.994	311.72	4.98633e-07	0.222757	0.000458114	1
58082	8.676	789.546	1	98.16	5.13836e-07	-0.222508	0.000465337	1
63233	8.665	1180.32	0.956	26.38	5.50728e-07	-0.221932	0.000488035	0
45820	3.66	521.197	0.012	3.56	5.56235e-07	0.221849	0.000488035	0
52993	5.309	638.694	0.192	5.68	5.71012e-07	0.221631	0.000488035	0
23695	3.831	290.034	1	21.1	5.75159e-07	-0.221571	0.000488035	1
58206	9.472	794.606	0.533	7.56	5.77393e-07	-0.221539	0.000488035	0
23418	5.31	287.201	0.988	27.94	5.98642e-07	0.221237	0.000499339	1
11295	3.831	188.071	0.737	5.83	6.64579e-07	-0.220363	0.000545444	0
59088	9.219	832.072	0.058	6.58	6.71125e-07	-0.220281	0.000545444	0
36486	8.895	411.263	0.022	8.01	7.33946e-07	-0.21953	0.000588949	0
41517	5.31	468.112	0.974	17.84	8.50245e-07	0.218289	0.000673745	0
25936	0.596	309.227	0.515	4.5	8.8312e-07	-0.217967	0.000682963	0
41107	5.567	463.233	0.673	12.55	8.93534e-07	0.217868	0.000682963	1
56346	5.31	724.273	0.878	14.95	8.94199e-07	0.217862	0.000682963	0
49867	4.792	582.091	0.002	6.27	9.7435e-07	0.217133	0.000735321	0
16174	0.86	230.185	0.008	19.55	1.05877e-06	-0.216424	0.000789628	1
58873	9.173	821.593	0.224	68.31	1.10789e-06	-0.216037	0.000816658	1
28280	5.272	330.265	0.102	24.17	1.14389e-06	0.215763	0.000833498	1
41661	5.496	470.108	0.016	5.68	1.18176e-06	0.215484	0.000851314	0
38917	5.31	439.087	0.828	9.48	1.28792e-06	0.214745	0.000917358	0
31666	8.63	361.167	0.8	4.3	1.31251e-06	-0.214582	0.000924486	0
13190	3.83	205.074	0.573	5.66	1.39732e-06	-0.214042	0.000973407	1
56131	9.224	718.574	0.768	5.76	1.44539e-06	-0.21375	0.000989758	0
62607	9.172	1101.11	0.411	3.72	1.45201e-06	-0.213711	0.000989758	0
58617	9.173	810.604	1	1185.81	1.50923e-06	-0.213376	0.00101046	1
25346	5.31	304.228	0.976	13.18	1.51427e-06	0.213347	0.00101046	1
39710	4.455	447.202	0.699	7.49	1.55735e-06	0.213104	0.00102839	1
37839	9.184	426.776	0.379	6.35	1.58064e-06	-0.212975	0.00103301	0
58204	9.301	794.604	0.176	8.37	1.60738e-06	-0.21283	0.00103976	0
27065	4.704	319.553	0.469	6.48	1.75317e-06	0.212074	0.00112261	0
44078	5.735	499.143	0.146	24.16	2.00508e-06	0.210901	0.00125558	0
18645	2.717	249.028	0.016	3.23	2.01633e-06	-0.210852	0.00125558	0
50812	2.94	598.081	0.315	3.44	2.04002e-06	0.210749	0.00125558	0
58024	8.863	787.069	0.305	7.94	2.06744e-06	-0.210632	0.00125558	0
25761	3.831	308.007	0.988	6.88	2.06939e-06	-0.210624	0.00125558	0
44077	5.705	499.142	0.14	23.98	2.07966e-06	0.21058	0.00125558	0
21988	3.83	276.055	0.764	9.08	2.30612e-06	-0.209671	0.00137917	0
55861	5.311	711.352	0.683	12.41	2.39524e-06	0.209336	0.00141908	0
17941	3.825	244.033	0.533	7.72	2.48068e-06	-0.209026	0.00144965	0
41719	5.202	471.11	0.014	18.56	2.50676e-06	0.208934	0.00144965	0
21249	5.309	269.19	0.635	7.84	2.51545e-06	0.208903	0.00144965	1
47145	5.311	539.158	0.621	8.9	2.5714e-06	0.208708	0.00145944	0
26629	5.71	315.233	0.461	17.99	2.57848e-06	0.208684	0.00145944	1
25773	3.831	308.071	0.351	4.66	2.64726e-06	-0.208451	0.00148511	0
48097	4.692	553.075	0.118	3.67	2.70632e-06	0.208255	0.00150493	0
35154	8.543	396.257	0.162	4.07	2.73684e-06	-0.208155	0.00150866	0
57906	8.63	782.572	1	3802.08	2.94734e-06	-0.207496	0.00160912	1
40919	5.311	461.159	0.916	13.62	2.96984e-06	0.207428	0.00160912	0
38050	4.455	429.191	0.232	5.68	3.00343e-06	0.207328	0.00161353	0
58201	8.857	794.562	0.517	18.53	3.03012e-06	-0.207249	0.00161419	0
38836	9.174	437.763	0.591	15.35	3.13095e-06	-0.206957	0.001654	0
42666	4.456	482.24	0.956	38.31	3.24042e-06	0.206649	0.00169768	1
1782	0.615	100.075	0.004	2.66	3.34971e-06	-0.206352	0.00174056	0
44322	5.311	502.135	0.074	10.33	3.40108e-06	0.206216	0.00175289	0
49023	4.717	568.125	0.006	10.47	3.49022e-06	0.205984	0.00176006	0
58122	5.309	791.311	0.673	7.47	3.49075e-06	0.205982	0.00176006	0
23516	4.286	288.218	0.082	10.54	3.4983e-06	0.205963	0.00176006	0
40349	5.309	454.636	0.896	14.97	3.67929e-06	0.20551	0.00183655	0
42429	4.629	479.228	0.537	5.62	3.93183e-06	0.204911	0.00193717	0
58328	8.872	798.565	0.002	10	3.94199e-06	-0.204888	0.00193717	0
41295	4.456	465.212	0.152	5.4	4.05925e-06	0.204623	0.00197675	0
63254	8.67	1183.33	0.052	23.76	4.08491e-06	-0.204566	0.00197675	0
58929	5.31	824.301	0.267	7.91	4.20323e-06	0.204308	0.0020186	0
39458	9.076	444.421	1	21.27	4.27494e-06	-0.204155	0.0020376	1
36773	5.935	414.322	0.02	10.37	4.39701e-06	-0.2039	0.00206421	0
58238	8.64	795.564	0.006	14.02	4.4174e-06	-0.203858	0.00206421	0
15039	2.719	221.061	0.956	3.71	4.45489e-06	-0.203781	0.00206421	1
58930	5.274	824.303	0.014	5.66	4.46445e-06	0.203762	0.00206421	0
42563	5.312	481.105	0.816	8.44	4.57676e-06	0.203536	0.00206421	0
63244	8.711	1181.83	0.004	22.23	4.57847e-06	-0.203533	0.00206421	0
23809	3.831	291.023	0.699	9.41	4.60535e-06	-0.203479	0.00206421	1
45809	4.698	521.11	0.136	3.53	4.61162e-06	0.203467	0.00206421	0
21252	5.189	269.191	0.062	5.41	4.62382e-06	0.203443	0.00206421	0
63324	8.631	1192.33	0.968	51.45	4.68435e-06	-0.203325	0.00207661	0
37645	9.176	424.779	1	428.8	4.82996e-06	-0.203046	0.00211979	1
38501	9.164	433.767	0.004	11.84	4.91344e-06	-0.20289	0.00211979	0
42063	5.311	475.111	0.992	36.68	4.91418e-06	0.202889	0.00211979	0
36318	5.311	410.085	0.974	8.59	4.91552e-06	0.202886	0.00211979	0
20498	4.228	263.567	0.942	9.36	5.00025e-06	0.20273	0.00213262	0
40398	5.216	455.141	0.008	21.24	5.01255e-06	0.202708	0.00213262	1
43992	5.709	498.138	0.495	35.36	5.13908e-06	0.20248	0.00215824	1
52256	5.311	624.731	0.04	4.3	5.14084e-06	0.202477	0.00215824	0
59556	9.202	855.575	0.026	7.55	5.20797e-06	-0.202359	0.00217203	0
25058	5.547	301.18	0.002	4.91	5.38462e-06	0.202053	0.00221938	0
14721	2.718	217.989	0.988	10.66	5.39152e-06	-0.202042	0.00221938	1
35530	2.94	400.176	0.044	4.21	5.67538e-06	0.201571	0.002311	0
50444	9.075	591.936	0.24	3.11	5.68699e-06	-0.201553	0.002311	0
36092	5.31	407.15	0.615	5.73	5.98634e-06	0.201081	0.00241715	0
49865	4.975	582.088	0.1	7.01	6.10894e-06	0.200895	0.00243984	0
40584	4.853	457.154	0.002	6.44	6.11952e-06	0.200879	0.00243984	0
28663	2.756	333.967	0.008	6.48	6.16797e-06	-0.200806	0.00244379	0
58702	5.31	813.844	0.084	3.62	6.3225e-06	0.200578	0.00248945	0
57103	8.55	751.572	1	32.81	6.36653e-06	-0.200514	0.00249132	1
59275	5.31	842.269	0.317	5.08	6.57672e-06	0.200214	0.00255778	0
27182	2.719	321.086	0.078	4.68	6.66914e-06	-0.200085	0.00257791	0
48336	5.311	555.755	0.02	6.13	6.79107e-06	0.199918	0.00260822	0
13499	2.718	208.039	0.285	5.06	6.82985e-06	-0.199865	0.00260822	0
59042	9.175	829.577	1	68.27	6.87682e-06	-0.199802	0.00261043	1
4582	3.831	130.065	1	24.98	7.11621e-06	-0.199485	0.00268523	1
59696	9.176	863.57	0.976	25.76	7.83022e-06	-0.198596	0.00293717	0
19066	2.699	253.031	0.012	3.03	7.88556e-06	-0.198531	0.00294053	0
43830	5.735	496.143	0.116	6.46	8.24313e-06	0.198117	0.00305589	0
23536	7.337	288.669	0.012	12.6	8.30194e-06	0.198051	0.0030598	0
44672	9.177	506.358	0.97	7.59	8.48446e-06	-0.197847	0.00310139	0
25909	5.31	309.183	0.982	43.43	8.51264e-06	0.197816	0.00310139	1
43988	5.736	498.138	0.483	39.15	8.59485e-06	0.197726	0.00311345	1
41913	5.311	473.115	0.994	86.57	8.72939e-06	0.197581	0.00312943	1
34018	8.549	384.275	1	16.93	8.75711e-06	-0.197551	0.00312943	1
28382	4.877	331.217	0.295	5.72	8.78706e-06	0.19752	0.00312943	0
21899	2.721	275.08	0.002	2.67	8.85393e-06	-0.197449	0.00313563	0
36948	9.173	416.791	1	60.2	9.18911e-06	-0.1971	0.00323625	1
27028	5.18	319.225	0.012	4.31	9.38208e-06	0.196905	0.00328596	0
35666	2.729	401.986	0.008	4.31	9.64808e-06	-0.196642	0.00334359	0
56998	5.309	747.834	0.076	7.11	9.65212e-06	0.196638	0.00334359	0
59100	9.175	832.586	1	342.96	9.76161e-06	-0.196532	0.00334506	1
16968	2.72	236.034	0.523	4.42	9.76189e-06	-0.196532	0.00334506	1
15015	2.719	220.996	0.319	3.96	1.00456e-05	-0.196262	0.00340867	1
46471	5.715	531.256	0.88	27.33	1.00551e-05	0.196253	0.00340867	1
63201	8.682	1176.32	0.782	8.2	1.0376e-05	-0.195957	0.00348934	0
41051	5.31	462.624	0.976	24.13	1.0451e-05	0.195889	0.00348934	0
42065	5.233	475.111	0.006	34.6	1.04582e-05	0.195882	0.00348934	0
36207	8.69	408.751	0.024	5.25	1.07189e-05	-0.19565	0.00355761	0
41991	5.311	474.116	0.8	38.87	1.11774e-05	0.195253	0.00369046	0
59223	8.633	839.042	0.198	8.22	1.13617e-05	0.195098	0.00373189	0
49093	4.673	569.14	0.016	8.24	1.171e-05	0.194812	0.00382646	0
47841	4.455	549.164	0.669	8.77	1.19839e-05	0.194592	0.00388799	0
36386	8.888	410.761	0.016	23.3	1.2021e-05	-0.194563	0.00388799	0
44874	4.838	509.132	0.002	9.56	1.21882e-05	0.194432	0.00392207	0
59035	5.31	829.263	0.349	5.22	1.23902e-05	0.194275	0.00395064	0
33244	8.549	376.285	0.641	5.58	1.24016e-05	-0.194266	0.00395064	0
56517	8.557	729.592	1	136.8	1.25956e-05	-0.194119	0.00399236	1
58959	9.224	825.564	0.587	10.43	1.30951e-05	-0.193748	0.00410647	0
59822	9.208	871.556	0.024	11.38	1.31316e-05	-0.193721	0.00410647	0
43896	5.706	497.152	0.108	9.68	1.31499e-05	0.193708	0.00410647	0
21251	5.221	269.19	0.006	7.77	1.3397e-05	0.19353	0.00416313	1
62606	9.17	1100.77	0.122	2.97	1.3564e-05	-0.193412	0.00419445	0
13068	2.72	204.015	0.878	5.39	1.36481e-05	-0.193353	0.00419996	1
46282	5.31	528.604	0.246	4.49	1.3766e-05	0.19327	0.00421577	0
52114	5.308	621.76	0.034	5.58	1.44195e-05	0.192826	0.00439469	0
39205	3.569	442.076	0.281	4.52	1.50881e-05	0.192391	0.00457646	0
25983	3.83	310.003	0.076	4.58	1.5637e-05	-0.192047	0.00472036	0
60270	9.182	898.06	0.078	16.23	1.59388e-05	-0.191863	0.00478867	0
58788	9.224	817.574	0.998	20.34	1.65985e-05	-0.191472	0.00494579	0
35728	8.63	402.775	1	190.89	1.66178e-05	-0.19146	0.00494579	1
58205	9.079	794.606	1	126.99	1.67361e-05	-0.191392	0.00495498	1
57288	9.323	758.567	0.002	4.36	1.68499e-05	-0.191326	0.00495498	0
43828	5.708	496.141	0.132	6.51	1.68832e-05	0.191307	0.00495498	0
46492	5.71	531.347	0.513	46.97	1.71168e-05	0.191174	0.00500041	1
16833	2.719	235.049	0.413	3.91	1.75592e-05	-0.190927	0.0051028	1
35684	5.306	402.196	0.026	3.42	1.76283e-05	0.190889	0.0051028	0
58989	5.308	826.787	0.164	3.68	1.78422e-05	0.190772	0.0051316	0
21266	7.219	269.227	0.998	46.69	1.79039e-05	0.190739	0.0051316	1
58402	8.631	801.545	1	208.52	1.79707e-05	-0.190703	0.0051316	1
43893	5.734	497.151	0.12	8.5	1.82575e-05	0.190549	0.00518928	0
12954	2.719	203.024	1	24.53	1.83364e-05	-0.190508	0.00518928	1
53042	5.307	640.196	0.104	5.33	1.84986e-05	0.190422	0.00521192	0
29295	5.26	340.249	0.756	6.4	1.87036e-05	-0.190315	0.00524635	0
41380	6.523	466.293	0.004	8.45	1.89012e-05	0.190213	0.00527843	0
47682	5.71	547.226	0.363	11.48	1.93003e-05	0.19001	0.00536624	0
29368	5.547	341.173	0.018	6.54	1.98346e-05	0.189744	0.00549071	0
55806	5.31	709.308	0.307	8.36	2.06266e-05	0.189362	0.00568515	0
35099	8.992	395.784	1	9.77	2.08102e-05	-0.189275	0.00569127	0
32762	9.323	371.366	0.204	4.57	2.08284e-05	-0.189267	0.00569127	0
48961	4.456	567.136	0.2	8.19	2.11923e-05	0.189097	0.00576585	0
57928	9.618	783.571	0.002	1.36	2.14224e-05	-0.188992	0.00578392	0
34792	8.545	392.26	0.162	8.7	2.14463e-05	-0.188981	0.00578392	0
49852	9.176	581.706	0.499	4.16	2.15735e-05	-0.188923	0.00578392	0
42411	5.311	479.108	0.936	10.37	2.16237e-05	0.1889	0.00578392	0
42821	4.702	484.131	0.154	8.26	2.22671e-05	0.188613	0.005931	0
23132	2.683	285.056	0.257	4.21	2.30484e-05	-0.188275	0.00611341	0
44673	9.235	506.359	0.008	7.06	2.40148e-05	-0.187871	0.00632206	0
57930	9.367	783.574	0.004	4.99	2.40459e-05	-0.187858	0.00632206	0
57862	9.054	780.893	0.635	3.52	2.41945e-05	-0.187798	0.00632206	0
18245	5.212	246.112	0.144	5.1	2.42339e-05	0.187782	0.00632206	0
37082	4.988	418.241	0.024	3.84	2.46651e-05	0.187608	0.0063854	0
44228	5.724	501.147	0.932	32.84	2.46781e-05	0.187603	0.0063854	1
48761	4.456	564.128	0.581	9.65	2.50405e-05	0.187459	0.00645281	0
46157	5.713	526.302	0.928	50.1	2.52654e-05	0.187371	0.00648441	1
42739	5.724	483.172	0.806	14.17	2.54058e-05	0.187316	0.00649414	0
48629	7.278	561.413	0.679	16.42	2.57037e-05	-0.187201	0.00653862	0
34090	5.405	385.167	0.004	3.08	2.58702e-05	0.187137	0.00653862	0
43443	5.714	491.264	0.11	7.07	2.59273e-05	0.187116	0.00653862	0
58043	9.045	788.059	0.044	17.98	2.59923e-05	-0.187091	0.00653862	0
18751	2.718	250.013	1	14.61	2.6362e-05	-0.186951	0.0066054	1
58683	5.31	813.293	0.754	6.29	2.70746e-05	0.186687	0.00675725	0
48966	5.72	567.197	0.152	6.45	2.75933e-05	0.186499	0.00685969	0
46491	5.736	531.347	0.465	44.2	2.78494e-05	0.186408	0.00689632	1
21250	4.228	269.19	0.044	4.27	2.80055e-05	0.186352	0.00690799	0
41732	3.569	471.136	0.723	7.03	2.83078e-05	0.186246	0.0069555	0
58004	5.309	786.358	0.084	7.81	2.86343e-05	0.186132	0.00700856	0
54804	5.305	681.204	0.034	3.36	2.88982e-05	0.186041	0.00701986	0
36197	9.061	408.476	0.012	1.17	2.8902e-05	-0.18604	0.00701986	0
43075	4.456	487.195	0.892	23.44	2.92437e-05	0.185923	0.00707576	1
11098	0.745	186.113	1	30.23	2.99769e-05	-0.185676	0.00722556	1
18913	6.949	251.201	0.02	6.97	3.07114e-05	-0.185435	0.00737457	0
26753	4.954	316.249	0.064	13.03	3.21647e-05	0.184974	0.00769441	0
26425	4.876	313.217	0.966	8.04	3.25085e-05	0.184868	0.0077243	1
59786	8.643	869.529	0.315	12.46	3.25687e-05	0.184849	0.0077243	0
42157	5.311	476.113	0.619	13.74	3.26552e-05	0.184823	0.0077243	0
45232	5.569	514.134	0.216	18.86	3.37384e-05	0.184496	0.00795084	0
55253	5.312	693.339	0.052	6.28	3.51337e-05	0.18409	0.00822042	0
58373	9.077	800.075	0.094	7.69	3.51656e-05	-0.184081	0.00822042	0
57744	9.03	775.574	0.437	5.59	3.53335e-05	-0.184033	0.00822042	0
45461	5.56	517.142	0.02	14.72	3.5401e-05	0.184014	0.00822042	0
57289	9.043	758.57	0.034	17.14	3.59957e-05	-0.183846	0.00832801	0
42849	7.117	484.327	0.182	14.49	3.62274e-05	0.183782	0.00835114	0
24563	5.709	297.223	0.481	35.53	3.65663e-05	0.183688	0.00839872	1
43275	3.569	489.11	0.353	5.06	3.68571e-05	0.183608	0.00843494	0
57892	9.05	782.064	0.018	5.49	3.74705e-05	-0.183442	0.00854448	0
47681	5.736	547.224	0.363	12.65	3.78674e-05	0.183336	0.00859354	0
40504	5.311	456.145	0.878	22.46	3.79567e-05	0.183312	0.00859354	0
38936	5.311	439.159	0.98	14.67	3.8243e-05	0.183237	0.00862754	0
59225	5.309	839.289	0.457	5.54	3.90084e-05	0.183037	0.00872216	0
59291	9.171	843.067	0.002	4.53	3.90452e-05	-0.183027	0.00872216	0
42886	3.715	485.112	0.06	4.18	3.90752e-05	0.183019	0.00872216	0
31593	4.571	360.274	0.034	3.49	3.92851e-05	-0.182965	0.00873825	0
57801	8.959	778.552	0.156	9.23	3.9456e-05	-0.182921	0.00874557	0
26831	6.948	317.208	0.002	2.23	3.96003e-05	-0.182885	0.00874698	0
13393	2.721	207.016	0.014	2.42	3.97945e-05	-0.182835	0.00875935	0
6440	3.836	146.061	0.026	4.89	4.05392e-05	-0.182648	0.0088924	0
37693	0.7	425.176	0.044	3.16	4.11533e-05	-0.182496	0.00899598	0
42795	9.173	483.835	0.587	4.1	4.21868e-05	-0.182244	0.0091902	0
49193	8.613	570.682	0.96	4.35	4.30757e-05	0.182033	0.00935171	0
28661	2.719	333.965	0.188	6.08	4.3242e-05	-0.181994	0.00935578	0
44732	5.727	507.14	0.004	8.34	4.34175e-05	0.181953	0.00936179	0
63263	8.773	1184.34	0.004	9.67	4.36563e-05	-0.181897	0.00938138	0
34745	9.367	391.775	0.741	7.75	4.47415e-05	-0.181647	0.0095821	0
57882	8.688	781.558	0.683	216.68	4.50574e-05	-0.181576	0.00961726	0
44321	4.866	502.134	0.319	6.22	4.6074e-05	0.181349	0.00980123	0
39090	5.31	441.155	0.854	13.9	4.65414e-05	0.181246	0.00983908	0
60816	8.644	934.506	0.295	7.7	4.65623e-05	0.181241	0.00983908	0
59843	8.631	872.538	0.832	22.85	4.69977e-05	0.181146	0.00989809	0
49149	9.169	569.454	0.994	6.85	4.73577e-05	0.181069	0.00992556	0
59239	9.059	840.065	0.309	10.52	4.74413e-05	-0.181051	0.00992556	0
23512	4.844	288.206	0.01	6.67	4.92184e-05	0.180675	0.0102635	0
33457	9.232	378.768	0.415	6.26	5.03037e-05	-0.180452	0.0104554	0
58481	9.148	804.566	0.635	27.05	5.12176e-05	-0.180268	0.0106106	0
59485	9.203	852.068	0.026	8.89	5.17069e-05	-0.18017	0.010677	0
58408	9.05	801.893	0.174	4.18	5.19331e-05	-0.180125	0.0106889	0
38486	6.75	433.333	0.24	11.51	5.30366e-05	0.17991	0.0108807	0
49092	4.467	569.133	0.016	6.88	5.32422e-05	0.17987	0.0108827	0
34423	5.132	388.307	0.002	4.34	5.34373e-05	-0.179832	0.0108827	0
36860	6.484	415.321	0.433	25.33	5.3561e-05	0.179809	0.0108827	1
26752	5.041	316.249	0.2	8.76	5.40727e-05	0.179711	0.0109515	1
40271	6.507	453.298	0.214	9.95	5.45742e-05	0.179616	0.0110179	0
57728	8.601	775.054	0.257	8.11	5.48498e-05	-0.179564	0.0110384	0
44325	5.737	502.148	0.232	15.62	5.53576e-05	0.17947	0.0111053	0
44085	4.876	499.166	0.703	13.58	5.58725e-05	0.179374	0.0111425	0
20834	2.271	266.07	0.054	528.11	5.58942e-05	-0.17937	0.0111425	0
44326	5.709	502.15	0.158	15.78	5.64035e-05	0.179277	0.0112087	0
22483	5.3	279.953	0.002	1.72	5.67242e-05	-0.179218	0.0112372	0
57705	8.141	774.561	0.028	4.88	5.73146e-05	-0.179112	0.0113188	0
27120	3.566	320.222	0.435	5.02	5.77444e-05	0.179035	0.0113683	0
60215	9.193	895.053	0.026	10.81	5.80181e-05	-0.178986	0.0113868	0
34220	4.661	386.201	0.002	3.31	5.83297e-05	0.178931	0.0113937	0
24562	5.736	297.223	0.427	39.88	5.86889e-05	0.178867	0.0113937	1
35643	9.062	401.378	1	15.92	5.869e-05	-0.178867	0.0113937	0
14646	3.725	217.038	0.112	2.52	5.87722e-05	-0.178853	0.0113937	0
63089	9.052	1162.86	0.088	31.47	5.93869e-05	-0.178745	0.0114778	0
59089	9.173	832.072	0.226	6.34	6.08956e-05	-0.178486	0.011712	0
27655	6.812	325.585	0.331	4.02	6.09818e-05	0.178471	0.011712	0
63183	9.051	1173.84	0.06	4.2	6.11532e-05	-0.178442	0.011712	0
58104	8.784	790.57	0.988	30.05	6.25069e-05	-0.178216	0.0119352	0
58022	8.559	787.056	0.768	20.22	6.50969e-05	-0.177795	0.0123626	0
58764	9.305	816.58	0.006	6.32	6.51353e-05	-0.177788	0.0123626	0
46938	5.311	537.166	0.984	13.71	6.55837e-05	0.177717	0.0124106	0
38077	6.738	429.3	0.026	8.98	6.66049e-05	-0.177557	0.0125663	0
57904	9.057	782.571	1	818.78	6.69114e-05	-0.177509	0.0125867	1
40312	4.196	454.075	0.756	9.01	6.75901e-05	0.177404	0.0126768	0
47706	5.567	547.342	0.435	5.51	6.93788e-05	0.177132	0.0129738	0
48651	5.309	562.095	0.539	7.04	7.10022e-05	0.176891	0.0132384	0
59823	9.18	871.56	0.808	12.82	7.2595e-05	-0.176659	0.0134956	0
41643	8.63	469.818	0.998	7.4	7.32206e-05	-0.176569	0.0135721	0
52315	2.401	625.395	0.002	0.97	7.35982e-05	0.176516	0.0135837	0
26742	2.174	316.212	0.331	13.04	7.37116e-05	-0.1765	0.0135837	0
58023	9.031	787.067	0.986	12.3	7.47021e-05	-0.17636	0.0137264	0
63344	8.695	1194.33	0.068	17.62	7.63696e-05	-0.176129	0.0139904	0
29012	5.709	337.214	0.453	33.9	7.65808e-05	0.1761	0.0139904	1
57613	9.027	771.067	0.23	4.56	7.84204e-05	-0.175851	0.0142854	0
6560	3.823	147.065	0.006	12.12	7.98909e-05	-0.175656	0.0145042	0
56975	9.507	746.605	0.888	9.72	8.02966e-05	-0.175603	0.0145042	0
22923	5.545	283.171	0.022	4.57	8.0308e-05	0.175601	0.0145042	0
42789	8.633	483.73	0.8	5.23	8.20313e-05	0.175378	0.0147733	0
27741	0.869	326.255	0.116	3.42	8.23819e-05	-0.175333	0.0147907	0
56976	9.533	746.607	0.088	7.74	8.25946e-05	-0.175306	0.0147907	0
42645	4.875	482.112	0.357	10.67	8.35881e-05	0.17518	0.0149265	0
24113	2.687	293.114	0.002	2.53	8.39064e-05	-0.17514	0.0149412	0
18761	3.722	250.05	0.002	4.55	8.603e-05	-0.174877	0.0152765	0
11193	9.119	187.058	0.054	1.92	8.69282e-05	0.174767	0.0153928	0
13026	2.716	203.662	0.048	1.27	8.74082e-05	-0.174709	0.0154231	0
52223	5.31	624.233	0.03	7.29	8.75854e-05	0.174687	0.0154231	0
42894	3.568	485.116	0.166	4.64	8.85226e-05	0.174575	0.0155449	0
57929	9.058	783.572	0.226	324.06	9.14249e-05	-0.174234	0.0160102	0
60028	9.232	883.052	0.265	5.9	9.19747e-05	-0.17417	0.0160621	0
43247	8.634	488.724	0.058	6.28	9.40178e-05	0.173937	0.0163386	0
63339	9.049	1193.35	0.501	10.23	9.40731e-05	-0.173931	0.0163386	0
58939	8.954	824.543	0.178	9.16	9.59685e-05	-0.17372	0.0166222	0
58106	8.998	790.572	0.81	48.76	9.69263e-05	-0.173614	0.0167424	1
59739	9.177	866.572	0.299	7.2	9.88497e-05	-0.173405	0.0170282	0
21101	8.088	268.219	0.152	5.45	0.000100502	0.173229	0.017266	0
34678	4.676	391.155	0.002	4.64	0.000101575	0.173116	0.017403	0
21487	4.496	271.166	0.152	7.75	0.000102554	0.173014	0.0175234	0
24886	2.718	299.995	0.323	6.84	0.000103667	-0.172898	0.0176029	0
57290	8.688	758.572	1	1787.33	0.000103737	-0.172891	0.0176029	1
41177	1.588	464.19	0.004	4.46	0.000104039	-0.17286	0.0176029	0
58851	9.226	820.584	0.996	27.08	0.000104162	-0.172848	0.0176029	0
45847	7.284	521.421	0.293	18.29	0.000104559	-0.172807	0.0176029	0
56919	9.375	744.587	0.18	9	0.000104938	-0.172768	0.0176029	0
40703	5.877	458.345	0.148	5.52	0.000104963	-0.172766	0.0176029	0
57605	9.005	770.594	0.1	22.64	0.000105948	-0.172666	0.0177213	0
26292	4.78	312.216	0.008	5.85	0.000107872	-0.172474	0.0179745	0
33520	4.67	379.207	0.006	3.99	0.000108029	0.172458	0.0179745	0
18126	7.095	245.226	0.092	8.96	0.000110334	-0.172232	0.01831	0
63296	8.664	1188.32	0.81	8.33	0.000110846	-0.172183	0.0183468	0
23803	5.302	291.016	0.002	2.1	0.000111866	-0.172085	0.0184367	0
11334	0.518	188.176	0.996	17.71	0.000111971	-0.172075	0.0184367	1
9755	1.604	175.026	0.006	3.14	0.000113	-0.171977	0.0185581	0
19271	4.843	254.175	0.006	4.08	0.000113735	-0.171907	0.0186306	0
63342	8.716	1193.82	0.004	15.94	0.000114861	-0.171801	0.0187298	0
21489	4.467	271.169	0.062	6.48	0.000115007	0.171788	0.0187298	0
49210	8.614	571.014	0.89	3.89	0.000115488	0.171743	0.0187298	0
42408	4.856	479.102	0.014	6.78	0.000115523	0.17174	0.0187298	0
35637	7.342	401.341	0.164	13.69	0.000115846	-0.17171	0.0187342	0
62636	9.169	1105.1	0.044	1.9	0.000116814	-0.17162	0.0188428	0
45648	5.27	519.194	0.012	31.84	0.000117314	0.171575	0.0188754	1
17233	5.723	238.139	0.03	5.86	0.000118058	-0.171507	0.0189427	0
23295	5.306	286.198	0.118	3.66	0.000118331	0.171482	0.0189427	0
57492	9.353	766.572	0.156	7.29	0.000121687	-0.171181	0.0193852	0
42643	5.561	482.106	0.104	6.41	0.000121706	0.171179	0.0193852	0
11367	2.718	189.04	0.006	3.94	0.000123088	-0.171058	0.0195336	0
59585	5.309	857.277	0.451	5.06	0.000123254	0.171043	0.0195336	0
43068	4.803	487.166	0.006	10.27	0.000124068	0.170972	0.0196136	1
57553	9.005	768.591	1	133.07	0.000124537	-0.170931	0.0196388	1
13752	0.528	210.159	0.12	2.93	0.000126321	-0.170778	0.0198706	0
62978	8.69	1148.34	0.846	10.34	0.000126845	-0.170733	0.0199036	0
46623	5.311	533.169	0.659	6.97	0.000127554	0.170673	0.0199655	0
58428	8.845	802.546	0.415	14.47	0.00012807	-0.17063	0.0199969	0
57891	8.944	782.06	0.11	7.34	0.000128703	-0.170576	0.0200463	0
34121	8.465	385.248	0.285	4.56	0.000129966	-0.170471	0.0201935	0
44431	4.865	503.217	0.255	4.1	0.000131121	0.170375	0.0203114	0
44385	6.378	503.143	0.004	13.12	0.000131366	-0.170355	0.0203114	0
42646	5.311	482.113	0.856	12.35	0.000132374	0.170272	0.0204139	0
44434	5.311	503.22	0.936	14.86	0.000132673	0.170248	0.0204139	0
37837	9.238	426.764	0.012	7.39	0.000134244	-0.17012	0.0206056	0
40400	5.311	455.142	0.986	35.31	0.000134867	0.17007	0.0206512	1
10225	3.392	179.046	0.002	9.69	0.000136435	-0.169945	0.0207911	0
60842	9.022	936.517	0.098	8.22	0.000136436	0.169945	0.0207911	0
58958	9.187	825.564	0.008	9.26	0.000138294	-0.169798	0.0210034	0
14935	2.719	220.011	0.006	2.28	0.000138492	-0.169783	0.0210034	0
56070	8.8	716.559	0.431	11.15	0.000139343	-0.169716	0.021082	0
30667	6.945	352.247	0.128	39.64	0.000140553	-0.169622	0.0212144	1
45309	5.736	515.199	0.499	25.11	0.000140959	0.169591	0.0212252	1
44323	5.196	502.136	0.04	5.19	0.000142498	0.169473	0.0214061	0
45307	5.709	515.199	0.353	23.85	0.000143888	0.169367	0.0215639	1
45646	5.311	519.193	0.994	32.51	0.000144385	0.16933	0.0215872	1
55136	9.62	689.51	0.022	4.87	0.000145992	-0.169209	0.0217762	0
41585	5.709	469.12	0.22	8.68	0.000146416	0.169178	0.0217882	0
63134	8.682	1168.32	0.956	22.56	0.000149704	-0.168936	0.0221764	0
567	0.714	81.0333	0.359	4.8	0.000149725	-0.168934	0.0221764	0
42133	8.637	475.742	0.705	8.67	0.000150287	0.168893	0.0222077	0
24356	4.876	295.206	0.363	5.21	0.000152636	0.168724	0.0224936	0
34640	8.69	390.775	1	75.76	0.000153097	-0.168691	0.0224936	1
58739	9.054	815.566	0.008	5.77	0.000153286	-0.168678	0.0224936	0
43066	5.311	487.165	0.705	9.53	0.000153778	0.168643	0.0225138	0
14486	5.194	215.941	0.006	9.75	0.000155175	0.168544	0.022626	0
29020	5.736	337.216	0.459	33	0.000155578	0.168516	0.022626	1
62117	8.684	1048.07	0.144	4.39	0.000155616	-0.168513	0.022626	0
36944	9.084	416.782	0.002	19.39	0.000155999	-0.168486	0.0226298	0
63305	8.689	1190.32	0.363	9.77	0.000156834	-0.168428	0.0226991	0
41571	5.313	469.118	0.998	18.6	0.000158657	0.168301	0.0229106	0
42788	8.671	483.73	0.056	4.84	0.000160563	0.168171	0.0231332	0
59189	9.165	837.067	0.08	6.33	0.000161013	-0.16814	0.0231454	0
58589	9.245	809.589	0.337	60.86	0.000161739	-0.168091	0.0231971	0
12053	2.74	195.064	0.084	38.31	0.000163388	-0.167979	0.0233807	0
59583	9.035	857.034	0.437	11.33	0.00016563	-0.16783	0.0236481	0
40582	5.311	457.138	0.487	8.06	0.000166673	0.167761	0.0237436	0
35531	2.833	400.178	0.042	3.48	0.000168382	0.167649	0.0239333	0
41439	5.735	467.194	0.006	4.06	0.000170042	0.167541	0.0241152	0
39079	5.308	441.088	0.054	5.06	0.000172226	0.167401	0.0242852	0
36404	5.718	410.972	0.222	4.63	0.000172264	-0.167399	0.0242852	0
23416	4.865	287.201	0.443	9.84	0.000172722	0.167369	0.0242852	1
57578	9.004	769.594	0.267	69.95	0.000172773	-0.167366	0.0242852	1
44504	5.739	504.154	0.054	10.26	0.000173893	0.167295	0.0243885	0
46534	4.244	532.202	0.004	11.19	0.000175903	0.167168	0.0246159	0
21121	6.823	268.636	0.02	19.06	0.000176635	0.167123	0.024664	0
44086	5.562	499.168	0.104	11.58	0.000177279	0.167083	0.0246994	0
63159	8.683	1171.34	0.752	21.95	0.000180746	-0.166869	0.0251273	0
58301	9.244	797.591	0.351	15.2	0.000182127	-0.166785	0.0252638	0
8140	5.3	161.029	0.002	0.23	0.000182615	-0.166756	0.0252763	0
12643	0.707	200.129	0.473	4.44	0.000183735	-0.166688	0.0253494	0
58524	9.052	806.881	0.246	3.36	0.000183944	-0.166675	0.0253494	0
47146	5.239	539.165	0.002	10.51	0.000184453	0.166645	0.0253645	0
18284	0.869	246.543	0.91	7.38	0.000186265	-0.166537	0.0255582	0
58766	9.468	816.586	0.034	4.75	0.000186845	-0.166503	0.0255825	0
57881	8.935	781.555	0.004	5.97	0.000188896	-0.166382	0.0257751	0
38682	8.658	435.771	0.19	13.75	0.000189066	0.166372	0.0257751	0
14834	2.792	219.018	0.002	2.04	0.000191717	-0.166218	0.0260805	0
45637	4.877	519.144	0.088	3.92	0.000193678	0.166105	0.0262908	0
27869	8.629	327.216	0.066	4.46	0.00019636	-0.165953	0.0265702	0
41587	5.735	469.122	0.299	7.93	0.000196574	0.165941	0.0265702	0
59506	9.234	853.066	0.004	6.14	0.000197654	-0.16588	0.0266594	0
42225	5.311	477.11	0.351	9.51	0.000198524	0.165831	0.0267198	0
45376	5.799	516.148	0.004	19.73	0.000199474	0.165778	0.0267908	0
58429	8.718	802.55	0.022	39.47	0.000203473	-0.165558	0.0272701	0
42131	8.673	475.739	0.321	8.06	0.00020463	0.165494	0.0273361	0
19131	4.461	253.159	0.006	3.89	0.000204827	0.165484	0.0273361	0
28491	3.823	332.244	0.265	4.73	0.000205881	-0.165427	0.027419	0
46535	4.283	532.202	0.575	10.3	0.000207224	0.165354	0.0274492	0
6451	1.667	146.081	0.796	6.88	0.000207591	-0.165335	0.0274492	1
58203	8.719	794.567	0.01	16.26	0.000207656	-0.165331	0.0274492	0
24204	5.208	294.1	0.008	2.88	0.00020784	0.165321	0.0274492	0
43273	4.199	489.108	0.992	29.03	0.000210234	0.165194	0.0276626	1
11333	0.604	188.176	0.002	10.29	0.000210508	-0.165179	0.0276626	1
58803	9.057	818.592	0.098	17.74	0.000211049	-0.165151	0.0276626	0
24396	6.883	295.659	1	28.11	0.000211201	0.165143	0.0276626	0
62033	9.202	1040.01	0.008	1.79	0.000212431	0.165078	0.0277663	0
46631	5.804	533.21	0.012	9.91	0.00021545	0.164921	0.0281029	0
57621	8.467	771.541	0.004	6.26	0.000216174	-0.164883	0.0281395	0
21349	1.649	270.091	0.006	26	0.000217646	-0.164807	0.0281749	0
3209	5.301	116.987	0.004	2.3	0.000217833	-0.164798	0.0281749	0
58648	10.026	811.67	0.036	6.19	0.000218138	-0.164782	0.0281749	0
36864	6.749	415.322	0.98	74.22	0.000218224	0.164778	0.0281749	1
14166	5.631	213.197	0.695	7.19	0.000220195	-0.164677	0.0283716	1
57932	9.533	783.576	0.002	2.62	0.000221713	-0.164601	0.0285092	0
43985	4.199	498.107	0.635	6.23	0.000222853	0.164543	0.0285978	0
44969	5.722	510.146	0.03	6.03	0.000224614	0.164455	0.0287655	0
43314	7.272	489.351	0.008	4.99	0.000225117	-0.16443	0.0287719	0
43810	8.643	495.716	0.232	5.41	0.000227765	0.164299	0.0289996	0
30751	4.876	353.209	0.427	5.22	0.000227814	0.164297	0.0289996	0
35163	5.946	396.312	0.86	10.11	0.000229632	-0.164208	0.0291725	1
40550	9.057	456.763	0.978	5.23	0.000230546	-0.164164	0.0291765	0
45230	5.486	514.133	0.008	18.9	0.000230584	0.164162	0.0291765	0
41607	6.099	469.29	0.002	5.17	0.000232263	-0.16408	0.0293304	0
46937	4.864	537.165	0.16	6.66	0.000233939	0.164	0.0294833	0
22572	6.855	280.625	0.016	13.68	0.000234654	0.163966	0.0295148	0
48657	5.714	562.186	0.244	8.88	0.00023949	0.163737	0.0300633	0
19527	0.63	256.103	0.016	3.58	0.000240951	0.163668	0.030128	0
32584	9.062	369.353	1	697.64	0.000240955	-0.163668	0.030128	1
58101	8.82	790.559	0.01	20.26	0.000242183	-0.163611	0.0302219	0
41911	4.867	473.113	0.539	19.83	0.000248763	0.163309	0.030982	1
38107	8.246	429.374	0.647	30.09	0.000250884	-0.163214	0.0311449	1
16189	4.794	230.249	0.034	7.28	0.000251054	-0.163206	0.0311449	0
46818	4.462	535.179	0.002	6.98	0.000253309	0.163105	0.0313633	0
28457	0.712	332.095	0.096	6.38	0.00025466	-0.163045	0.0314503	0
41729	4.529	471.134	0.052	4.41	0.000255215	0.163021	0.0314503	0
36683	6.504	413.306	0.872	12.69	0.0002555	0.163008	0.0314503	1
40339	6.883	454.329	0.006	6.98	0.00025667	0.162957	0.0315228	0
29180	9.052	339.183	0.707	4.12	0.000257084	-0.162939	0.0315228	0
42892	4.199	485.115	0.98	13.75	0.000259241	0.162844	0.031726	0
58752	5.307	816.31	0.277	4.06	0.000260534	0.162788	0.0318228	0
25038	6.42	301.142	0.01	14.07	0.000263506	-0.16266	0.0321239	0
24303	5.349	294.962	0.002	6.7	0.000265886	-0.162558	0.0323519	0
36671	9.053	413.258	0.024	8.34	0.000267424	-0.162493	0.0324492	0
28281	5.329	330.265	0.713	13.71	0.00026771	0.162481	0.0324492	1
58917	9.04	823.56	0.012	6.64	0.000268544	-0.162446	0.0324882	0
22722	5.419	281.227	0.447	11.24	0.000270152	0.162378	0.0326167	1
59396	8.879	848.543	0.02	5.77	0.000271565	-0.162319	0.0326167	0
37549	5.916	423.322	0.04	8.31	0.000271622	0.162317	0.0326167	0
63141	9.053	1168.85	0.058	3.12	0.000271664	-0.162315	0.0326167	0
37500	5.315	423.117	0.006	4.42	0.000273363	0.162244	0.0327586	0
38637	5.709	435.181	0.353	14.02	0.000275798	0.162144	0.032988	1
58177	8.78	793.561	0.01	34.97	0.000277097	-0.162091	0.033081	0
44386	4.865	503.143	0.214	4.59	0.000277879	0.162059	0.033112	0
42117	7.117	475.388	0.068	11.74	0.000281761	-0.161901	0.0335115	0
41178	2.02	464.19	0.006	3.38	0.000283321	-0.161839	0.0335987	0
30192	7.027	348.291	0.004	17.31	0.000283554	-0.161829	0.0335987	0
42995	4.199	486.101	0.996	89.5	0.000284313	0.161799	0.0336213	1
18845	3.852	251.023	0.15	7.07	0.000284805	-0.161779	0.0336213	1
37699	5.817	425.211	0.032	8.04	0.000287022	-0.161691	0.03382	0
11216	0.637	187.12	0.15	2.77	0.000287838	0.161659	0.0338532	0
58442	8.717	803.053	0.481	21.67	0.000290709	-0.161546	0.0340419	0
43416	4.199	491.105	0.986	13.73	0.00029078	0.161543	0.0340419	0
43055	4.57	487.107	0.004	16.75	0.000291458	0.161517	0.0340419	0
44145	3.714	500.081	0.07	4.11	0.000291589	0.161512	0.0340419	0
35823	2.715	403.977	0.006	6.38	0.000293487	-0.161438	0.0342004	0
38639	5.736	435.182	0.457	16.36	0.000294285	0.161407	0.0342264	1
58647	9.965	811.667	0.357	11.48	0.00029479	-0.161387	0.0342264	0
18292	2.562	246.775	0.03	1.18	0.000298061	-0.161262	0.034543	0
22317	6.824	278.63	0.178	41.79	0.000301375	0.161136	0.0348633	0
21794	6.82	274.125	0.882	8.04	0.000304012	0.161036	0.0351043	1
27312	5.308	322.24	0.014	6.52	0.00030914	0.160845	0.0356315	0
37618	9.326	424.305	0.064	8.63	0.000312131	-0.160735	0.035911	0
58014	9.248	786.603	1	303.85	0.000313126	-0.160699	0.0359601	1
26003	0.716	310.113	0.289	5.67	0.000316133	-0.16059	0.0362398	0
36093	5.23	407.151	0.004	3.79	0.000326491	0.160221	0.0373596	0
55366	7.126	696.555	0.006	8.3	0.00033624	-0.159883	0.0384059	0
30207	7.244	348.709	1	30.07	0.000337592	0.159837	0.038489	0
41584	5.279	469.12	0.016	19.33	0.000338665	0.1598	0.038489	0
44171	5.344	500.283	0.004	4.99	0.000338789	0.159796	0.038489	0
63120	9.044	1166.36	0.313	6.1	0.00034323	-0.159646	0.0389031	0
36470	7.095	411.205	0.004	7.73	0.000344699	-0.159597	0.0389031	0
17005	5.722	236.141	0.238	8.59	0.000344745	-0.159596	0.0389031	0
42893	4.87	485.115	0.144	4.87	0.000344889	0.159591	0.0389031	0
28772	2.676	335.038	0.02	2.8	0.000346144	-0.159549	0.0389754	0
26861	4.282	317.604	0.699	9.43	0.000347073	0.159518	0.0390107	0
59951	9.205	878.565	0.016	11.37	0.000349008	-0.159454	0.0391587	0
25591	4.012	306.169	0.04	5.01	0.000350957	0.15939	0.0393078	0
24480	6.961	296.666	0.07	8.3	0.000353147	0.159319	0.0394833	0
32304	4.703	367.155	0.002	3.79	0.000355871	0.15923	0.0396897	0
26754	5.142	316.25	1	30.72	0.000356245	-0.159218	0.0396897	1
40477	4.199	455.578	0.501	6.68	0.000362076	0.159031	0.0402686	0
44391	5.727	503.146	0.894	14.04	0.000364264	0.158961	0.040441	0
19429	6.389	255.209	0.002	14.8	0.000365915	0.158909	0.0405533	0
41516	4.863	468.11	0.154	7.18	0.000372536	0.158702	0.0411628	0
25180	4.708	302.233	0.555	15.45	0.000372942	0.158689	0.0411628	2
22319	6.783	278.639	0.82	90.79	0.000373364	0.158676	0.0411628	0
40795	7.563	459.258	0.002	21.69	0.000374127	-0.158652	0.0411754	0
40501	5.231	456.143	0.002	27.15	0.000376947	0.158565	0.0413834	0
44897	5.713	509.281	0.002	3.31	0.000377322	0.158554	0.0413834	0
44463	5.229	503.315	0.006	79.1	0.000378002	0.158533	0.0413863	1
27299	2.598	322.193	0.024	4.28	0.000382938	-0.158383	0.0418544	0
16455	1.928	232.155	0.575	25.24	0.000384125	-0.158347	0.0419119	2
59997	8.661	881.515	0.056	7.83	0.000386573	0.158273	0.0421066	0
38184	5.526	430.316	0.004	9.43	0.000390954	-0.158143	0.0425107	0
2244	6.197	104.107	0.695	2.78	0.000392264	-0.158104	0.0425198	0
45819	4.451	521.191	0.096	1206.1	0.000392379	0.1581	0.0425198	0
8905	2.897	168.056	0.122	5.51	0.000396579	-0.157977	0.0428662	0
62244	8.677	1060.72	0.327	3.03	0.000396928	-0.157966	0.0428662	0
36597	9.048	412.756	0.028	21.34	0.000398125	-0.157932	0.0429223	0
4672	5.293	130.965	0.002	1.26	0.00040468	-0.157742	0.043555	0
34945	6.634	393.31	0.056	27.99	0.000414867	-0.157452	0.0445288	0
41165	4.89	464.097	0.034	3.78	0.000415696	0.157429	0.0445288	0
47180	7.259	539.416	0.519	12.81	0.000415835	-0.157425	0.0445288	0
38273	6.505	431.316	0.056	22.61	0.00041987	0.157313	0.0448851	0
9191	3.735	170.118	0.954	24.34	0.000425201	-0.157165	0.0453784	1
31579	2.117	360.201	0.01	9.64	0.000427607	-0.1571	0.0454284	1
21264	7.715	269.227	0.02	7.46	0.000427744	0.157096	0.0454284	0
58920	5.306	823.804	0.136	3.79	0.000427819	0.157094	0.0454284	0
57871	9.053	781.231	0.573	3.97	0.000431292	-0.156999	0.045678	0
24151	5.321	293.212	0.004	5.57	0.000431611	0.156991	0.045678	0
41658	4.865	470.107	0.98	60.02	0.000432596	0.156964	0.0457059	1
21706	5.971	273.101	0.006	7.87	0.000437256	-0.156839	0.0461214	0
41730	4.199	471.135	0.998	40.63	0.000438015	0.156818	0.0461248	1
48191	9.054	553.682	0.888	4.7	0.00044205	-0.156711	0.0464725	0
45167	4.873	513.146	0.098	5.29	0.00044513	0.15663	0.0467188	0
5997	3.737	142.123	0.551	8.36	0.000455622	-0.156357	0.0477409	0
21502	4.904	271.206	0.345	6.39	0.000457116	0.156319	0.0478184	0
58090	8.561	790.058	0.218	14.56	0.000458276	-0.156289	0.0478607	0
13737	3.737	210.111	0.481	30.4	0.000460366	-0.156235	0.0479463	0
46348	9.168	529.461	1	7.04	0.000460607	0.156229	0.0479463	0
25168	2.085	302.197	0.465	48.87	0.000466786	-0.156073	0.0484304	0
11115	3.459	186.149	0.068	3.92	0.000467381	-0.156058	0.0484304	0
39053	6.374	440.411	0.409	25.61	0.00046755	-0.156054	0.0484304	0
58500	9.243	805.572	0.242	14.75	0.000472341	-0.155934	0.0488468	0
25259	5.052	303.196	0.126	10.29	0.000473825	0.155897	0.0489205	1
55	0.709	57.0334	0.122	3.91	0.000474873	-0.155871	0.0489223	0
25171	1.737	302.197	0.459	54.28	0.000475386	-0.155858	0.0489223	0
17451	2.719	239.985	0.12	4.27	0.000476591	-0.155829	0.0489668	0
14603	5.288	216.912	0.008	3.17	0.000481464	-0.155709	0.0493398	0
63062	8.691	1159.34	0.862	13.85	0.000481777	-0.155701	0.0493398	0
63001	9.044	1151.37	0.747	8.82	0.000482583	-0.155681	0.0493426	0
10800	1.738	184.061	0.83	19.99	0.000483418	0.155661	0.0493483	1
57890	8.825	782.052	0.042	5.45	0.00048857	-0.155536	0.0497941	0
35500	9.053	399.772	1	643.39	0.000490064	-0.1555	0.0498662	1
17698	2.619	241.954	0.096	3.16	0.000492825	0.155434	0.0500667	0
34931	8.547	393.254	0.188	4.92	0.000495832	-0.155362	0.0502916	0
60187	9.233	893.548	0.056	5.74	0.000500446	-0.155253	0.0506786	0
18908	5.303	251.179	0.052	5.59	0.000505727	0.155129	0.0511317	0
45380	4.986	516.208	0.856	18.71	0.000510682	0.155014	0.0515504	1
20935	2.609	267.016	0.002	4.37	0.000512418	-0.154974	0.0516435	1
11322	3.736	188.129	0.641	23.65	0.000513559	-0.154947	0.0516763	1
57342	10.972	760.581	0.018	2.2	0.000514485	-0.154926	0.0516874	0
58130	8.779	791.573	0.014	12.48	0.000516949	-0.15487	0.0518528	0
45600	6.786	518.326	0.904	149.74	0.000519213	0.154818	0.0519976	1
48770	5.416	564.207	0.006	7.6	0.000520109	0.154797	0.0520051	0
41604	7.481	469.233	0.743	11.93	0.000524381	0.154701	0.0523497	0
35455	8.913	399.264	0.01	6.56	0.00052866	-0.154604	0.0526939	0
46650	6.218	533.272	0.014	10.66	0.000534537	0.154473	0.053117	0
42296	5.307	478.117	0.04	5.56	0.00053458	0.154472	0.053117	0
32458	5.633	368.281	1	33.4	0.000538525	-0.154385	0.0532936	1
30184	4.875	348.255	0.02	6.16	0.000538625	0.154383	0.0532936	0
7794	2.875	158.154	0.002	5.03	0.000538879	-0.154377	0.0532936	0
15451	0.629	224.129	0.222	5.52	0.000542596	0.154296	0.0535776	1
38204	8.442	430.751	0.273	5.1	0.000548598	-0.154165	0.0540859	0
41181	4.817	464.192	0.651	19.6	0.000554129	0.154046	0.0545464	1
58765	9.072	816.583	1	80.64	0.000556411	-0.153997	0.0546861	0
7788	0.826	158.118	0.269	19.81	0.000558232	-0.153958	0.0547543	1
35658	9.056	401.767	0.048	9.8	0.000558832	-0.153945	0.0547543	0
51349	7.13	608.524	0.717	44.25	0.000561484	-0.153889	0.0549097	0
56471	8.494	728.522	0.934	12.03	0.000562978	-0.153857	0.0549097	0
38872	5.915	438.32	0.335	3.67	0.000563271	-0.153851	0.0549097	0
35391	8.902	398.762	0.022	22.36	0.000563883	-0.153838	0.0549097	0
62281	8.632	1063.74	0.998	11.24	0.000567892	-0.153754	0.0552153	0
24365	6.818	295.226	0.006	8.98	0.000571662	-0.153675	0.0554967	1
58011	8.621	786.581	0.002	16.24	0.000576469	-0.153575	0.0558778	0
21056	5.282	268.04	0.058	4.21	0.000578092	-0.153542	0.0559496	0
24672	5.42	298.229	0.034	9.97	0.000579992	0.153503	0.0559533	0
59573	8.543	856.552	0.072	5.82	0.000580191	-0.153499	0.0559533	0
37664	5.72	424.951	0.361	6.9	0.000580778	-0.153486	0.0559533	0
63156	8.671	1170.82	0.022	3.87	0.000582756	-0.153446	0.0560586	0
41576	4.866	469.119	0.13	7.25	0.000585494	0.15339	0.0562367	0
47962	4.451	551.161	0.086	10.15	0.000592924	0.153239	0.0568642	0
22006	6.818	276.128	0.002	4.57	0.000594286	0.153212	0.0569087	1
35420	0.632	399.082	0.786	6.1	0.000598471	0.153128	0.0571388	0
22165	5.588	277.142	0.19	6.77	0.000598492	-0.153128	0.0571388	1
33612	8.171	380.242	0.04	6.09	0.000604842	-0.153001	0.0576156	0
20525	1.63	263.902	0.028	1.68	0.000605303	0.152992	0.0576156	0
44393	4.199	503.151	0.976	9.1	0.000606726	0.152964	0.0576644	0
21963	6.821	275.626	0.966	232.62	0.000610576	0.152888	0.0579015	0
11315	0.7	188.129	0.784	14.39	0.000611047	-0.152879	0.0579015	1
36280	9.084	409.288	0.224	4.27	0.000613361	-0.152834	0.0579876	0
42816	4.2	484.104	0.389	7.42	0.000614064	0.15282	0.0579876	0
45572	4.199	518.126	0.998	36.73	0.0006147	0.152808	0.0579876	1
12634	0.862	200.128	0.904	5.81	0.000618227	-0.152739	0.0581529	1
2764	3.144	111.021	0.032	2.52	0.00061995	0.152706	0.0581529	0
16052	2.67	229.119	0.006	3.94	0.000619983	-0.152705	0.0581529	0
37617	9.356	424.305	0.164	6.86	0.000620121	-0.152703	0.0581529	0
49684	7.391	578.482	0.212	11.05	0.000622798	-0.152651	0.0582879	0
19547	6.112	256.228	0.006	8.74	0.000624148	-0.152625	0.0582879	0
51054	4.888	603.082	0.018	2.03	0.000624319	0.152622	0.0582879	0
55700	8.495	706.539	1	44.64	0.00062859	-0.15254	0.0586003	1
29371	9.046	341.179	0.008	3.82	0.000631499	-0.152485	0.058785	0
19781	6.821	258.651	1	293.63	0.000640633	0.152312	0.0595479	0
43471	9.179	491.827	1	14.1	0.000641859	-0.152289	0.0595508	0
24850	5.436	299.237	0.088	17.74	0.000642543	0.152276	0.0595508	1
31906	8.472	363.275	0.974	5.7	0.00064418	-0.152246	0.0595739	0
8075	3.31	160.17	0.162	10.38	0.000644672	-0.152237	0.0595739	0
18500	2.728	248.034	0.002	2.98	0.000652094	-0.152099	0.060172	0
59947	8.667	878.51	0.01	9.13	0.000657194	0.152005	0.0605545	0
57624	9.048	771.577	1	73.96	0.000661771	-0.151922	0.0605904	1
42171	6.778	476.279	0.273	9.28	0.000662042	0.151917	0.0605904	0
779	1.668	86.0601	0.575	6.21	0.000662165	-0.151915	0.0605904	1
36910	2.945	416.229	0.413	67.52	0.000662222	-0.151913	0.0605904	0
21840	8.802	274.905	0.006	1.94	0.000662362	0.151911	0.0605904	0
26514	4.876	314.234	0.984	47.24	0.000664418	-0.151874	0.0606909	2
59119	9.452	833.593	0.002	10	0.000671598	-0.151744	0.0612584	0
19142	5.736	253.194	0.026	4.23	0.000676325	0.151659	0.0616009	0
45684	6.785	519.328	0.14	59.03	0.000682387	0.151552	0.0620639	0
57552	9.496	768.588	0.142	5.97	0.00068771	-0.151458	0.0624584	0
46804	4.975	535.096	0.014	4.77	0.000691171	0.151397	0.062683	0
32987	2.785	374.144	0.006	8.02	0.000697551	-0.151286	0.0631712	0
59231	9.242	839.568	0.084	11.82	0.000700796	-0.15123	0.0633746	0
45418	5.271	516.366	0.002	7.92	0.000703889	-0.151177	0.0635636	0
58640	8.661	811.546	0.012	20.65	0.000707868	-0.151109	0.063832	0
48080	5.256	552.686	0.016	5.02	0.000714305	-0.150999	0.0643173	0
34212	4.2	386.164	0.948	8.84	0.000715903	0.150972	0.0643173	0
47538	5.713	545.359	0.072	6.48	0.000716294	0.150965	0.0643173	0
58153	8.948	792.588	0.858	31.83	0.000721139	-0.150884	0.0646608	0
36091	4.872	407.15	0.034	4.4	0.000725559	0.15081	0.0649652	0
58997	8.642	827.049	0.042	9.25	0.000726948	0.150787	0.0649978	0
6468	0.627	146.118	1	175.03	0.000730811	-0.150722	0.0652098	1
37980	6.486	428.374	1	32.91	0.000731377	-0.150713	0.0652098	1
37924	4.6	427.755	0.118	3.69	0.000737353	-0.150614	0.0656503	0
50896	7.89	599.446	0.006	7.96	0.000747572	-0.150447	0.0663872	0
15186	0.859	222.17	0.002	5.08	0.000747724	0.150444	0.0663872	0
17288	8.487	238.891	0.108	3.43	0.000753006	0.150359	0.0667571	0
52753	4.199	634.015	0.9	5.18	0.000753996	0.150343	0.0667571	0
25344	4.867	304.227	0.02	3.7	0.000758197	0.150275	0.0670354	0
34020	5.335	384.276	0.002	7.07	0.000763069	-0.150197	0.0673722	0
40587	5.736	457.164	0.477	8.54	0.000770616	0.150078	0.0679127	0
23518	4.424	288.218	1	108.95	0.000771333	-0.150066	0.0679127	1
24003	0.718	292.103	0.036	3.57	0.000776217	-0.149989	0.068088	0
10445	0.624	181.071	0.008	2.35	0.000776289	-0.149988	0.068088	0
42838	4.514	484.255	0.006	5.09	0.000776821	0.14998	0.068088	0
27467	7.273	323.639	0.459	8.97	0.00077762	0.149967	0.068088	0
56105	8.656	717.589	0.182	3.56	0.000782804	-0.149886	0.0684473	0
57345	9.052	760.588	1	2053.4	0.000784786	-0.149856	0.0685261	1
37318	9.256	420.764	1	18.95	0.000789793	-0.149778	0.0688685	1
21831	6.821	274.626	1	205.97	0.000794149	0.149711	0.0691032	0
25169	0.882	302.197	0.433	104.17	0.000794665	-0.149703	0.0691032	0
58566	9.25	808.585	1	109.56	0.000806145	-0.149528	0.0700054	0
46272	5.121	528.362	0.124	4.54	0.000808535	-0.149492	0.0701169	0
45228	5.887	514.132	0.174	22.34	0.000815735	0.149383	0.0704991	0
50379	6.167	590.429	0.008	3.45	0.000816475	-0.149372	0.0704991	0
20024	3.67	260.186	0.016	6.08	0.000819369	-0.149329	0.0704991	0
16672	1.403	234.002	0.002	1.5	0.000819384	-0.149329	0.0704991	0
19170	6.815	253.602	0.475	5.86	0.000819542	0.149326	0.0704991	0
49238	4.701	571.321	0.257	7.92	0.000819615	-0.149325	0.0704991	0
47705	5.856	547.342	0.082	6.62	0.000827961	0.149201	0.0710649	0
25607	4.907	306.243	0.014	6.86	0.000828434	0.149194	0.0710649	0
26825	5.37	317.174	0.008	4.59	0.000832946	0.149128	0.0711704	0
18963	3.853	252.013	0.06	3.56	0.000834146	-0.14911	0.0711704	0
20886	6.821	266.641	1	771.07	0.0008347	0.149102	0.0711704	0
34816	9.511	392.779	0.507	4.86	0.000834898	-0.149099	0.0711704	0
38178	5.287	430.296	0.006	30.19	0.000835278	-0.149093	0.0711704	0
57824	9.049	779.562	1	85.5	0.000837799	-0.149056	0.0712302	2
20026	3.334	260.187	0.994	48.21	0.000838227	-0.14905	0.0712302	2
57727	8.55	775.051	0.008	8.69	0.000839386	-0.149033	0.0712332	0
37021	6.866	417.336	0.503	12.83	0.000841058	-0.149009	0.0712797	0
15515	5.316	225.045	0.002	138.8	0.000851115	-0.148863	0.0718699	0
36527	0.632	412.051	0.912	6.84	0.000851225	0.148861	0.0718699	0
58042	8.687	788.028	0.036	6.62	0.000851424	-0.148859	0.0718699	0
60368	7.192	904.729	0.206	3.4	0.000853665	-0.148826	0.0719438	0
57263	9.074	757.623	1	18.23	0.000854569	-0.148813	0.0719438	1
44318	3.723	502.093	0.445	5.17	0.000857032	0.148778	0.071979	0
20937	2.675	267.018	0.998	7.24	0.000857257	-0.148775	0.071979	1
57780	8.692	777.546	1	75.83	0.000859668	-0.14874	0.0720859	1
26421	5.578	313.213	0.006	10.66	0.000861237	0.148718	0.072122	0
26884	2.271	317.996	0.046	125.31	0.000868366	-0.148617	0.072493	0
21691	3.736	273.067	0.138	6.97	0.00087033	-0.148589	0.072493	0
23503	4.195	288.166	0.008	4.33	0.000870371	0.148588	0.072493	0
52663	7.236	632.291	0.114	7.75	0.000871104	0.148578	0.072493	0
40115	7.48	451.376	0.002	28.85	0.000871705	-0.14857	0.072493	0
33458	8.948	378.77	0.711	6.14	0.000872734	-0.148555	0.072493	0
14625	2.707	216.912	0.002	0.53	0.000873671	0.148542	0.072493	0
11129	5.633	186.186	0.134	4.81	0.000884936	-0.148384	0.0733123	1
59635	9.22	859.555	0.002	9.27	0.000885859	-0.148371	0.0733123	0
32457	5.774	368.276	0.002	16.73	0.00088949	-0.148321	0.0735169	0
31621	0.632	360.57	0.269	11.59	0.000895324	0.148241	0.0739027	0
22358	1.731	279.038	0.006	2.52	0.000903035	-0.148135	0.0744422	0
58568	8.733	808.589	1	324.38	0.000909636	-0.148045	0.0748092	0
26646	6.883	315.631	0.922	18.58	0.000910936	0.148028	0.0748092	0
33025	7.898	374.339	0.168	14.51	0.000911026	-0.148026	0.0748092	0
14974	7.36	220.168	0.002	1.59	0.000916984	-0.147946	0.075201	0
26867	2.103	317.694	0.004	25.34	0.000918889	-0.14792	0.0752598	0
47765	9.054	548.364	0.132	5.75	0.000920598	-0.147897	0.0753026	0
10801	0.878	184.061	0.048	47.56	0.000929304	0.147781	0.0759167	1
59743	8.672	867.024	0.082	11.05	0.000933906	0.14772	0.0761686	0
16096	1.748	229.922	0.012	2.66	0.000934791	-0.147708	0.0761686	0
39485	3.062	445.07	0.002	4.59	0.000936972	-0.14768	0.0761889	0
18744	1.74	249.998	0.044	4.37	0.000937443	-0.147673	0.0761889	0
18402	5.88	247.123	0.413	3.27	0.000939092	-0.147652	0.0762252	0
23066	2.214	284.187	0.126	12.72	0.000941252	-0.147623	0.0763028	0
36135	9.051	407.757	0.906	64.51	0.000944097	-0.147586	0.0764357	1
58814	9.166	819.067	0.006	3.73	0.000947743	-0.147538	0.076633	0
58884	5.308	822.245	0.677	4.83	0.000951075	0.147495	0.0768045	0
37727	9.917	425.307	0.014	16.25	0.000952517	-0.147476	0.076823	0
40272	10.999	453.299	0.034	3.43	0.000960094	0.147378	0.0773358	0
23929	2.738	291.935	0.116	0.53	0.000963908	0.147329	0.0775445	0
29840	5.981	345.219	0.754	85.06	0.000965196	0.147312	0.0775496	1
38921	4.199	439.11	0.994	35.81	0.000972787	0.147215	0.0780606	1
41726	5.703	471.126	0.012	4.08	0.000977345	0.147157	0.0783273	0
19896	5.922	259.284	0.006	189.46	0.000979444	-0.147131	0.0783963	0
47798	9.054	548.698	0.936	5.84	0.000980908	-0.147112	0.0784145	0
46197	4.866	527.17	0.006	25.06	0.000982868	0.147087	0.0784723	0
57577	8.692	769.562	1	62.41	0.000985421	-0.147055	0.0785106	1
52859	7.192	635.925	0.365	2.28	0.000985826	0.14705	0.0785106	0
21217	1.637	269.089	0.397	23.14	0.00099237	-0.146968	0.0789085	0
21505	4.635	271.208	0.002	1.78	0.000993731	0.146951	0.0789085	0
42234	4.199	477.152	0.914	4.88	0.000995569	0.146928	0.0789085	0
20157	6.911	261.222	0.16	30.17	0.000995801	-0.146925	0.0789085	0
43464	9.257	491.737	0.002	7.03	0.000997607	-0.146903	0.078953	0
35992	9.245	405.789	0.002	3.98	0.000999711	-0.146877	0.0790208	0
23652	4.783	289.215	0.004	9.98	0.00100189	0.146849	0.0790313	1
42872	3.263	484.79	0.034	4.64	0.00100412	-0.146822	0.0790313	0
24559	5.336	297.222	0.028	8.42	0.00100528	0.146808	0.0790313	0
39082	4.199	441.111	0.05	5.1	0.00100692	0.146787	0.0790313	0
44183	6.823	500.33	0.04	8.51	0.00100742	0.146781	0.0790313	0
40014	6.751	450.357	0.228	9.54	0.00100824	0.146771	0.0790313	0
50515	5.713	593.229	0.006	8.32	0.00100857	0.146767	0.0790313	0
23285	5.978	286.145	0.936	210.52	0.00100996	0.14675	0.0790424	1
23322	5.972	286.309	0.12	6.77	0.00102027	-0.146624	0.0797507	0
20488	7.098	263.237	0.212	20.33	0.00102231	-0.146599	0.0798119	1
44262	8.531	501.22	0.022	5.4	0.00102527	0.146563	0.0799443	0
16353	5.892	231.139	0.074	4.15	0.00102763	-0.146534	0.0800071	0
19775	5.919	258.28	0.844	26.12	0.0010286	-0.146522	0.0800071	1
45821	4.904	521.211	0.353	5.14	0.00102993	0.146506	0.0800126	0
23657	4.423	289.221	0.006	42.68	0.00103265	-0.146473	0.0800225	0
14716	2.332	217.988	0.242	5.62	0.00103266	-0.146473	0.0800225	0
19760	2.284	258.171	0.232	7.04	0.00103384	-0.146459	0.0800225	0
55312	7.736	694.995	0.006	6.03	0.00104086	-0.146375	0.080467	0
50055	4.454	585.16	0.086	6.99	0.00104656	0.146307	0.0808098	0
33165	1.841	375.851	0.008	3.57	0.00105147	0.146248	0.08109	0
55579	7.461	703.485	0.437	8.83	0.00105437	-0.146214	0.0812145	0
23276	2.085	286.124	0.002	3.12	0.00106044	-0.146142	0.0815831	0
25967	4.975	309.608	0.03	11.96	0.00106647	0.146072	0.0819475	0
14635	2.322	217.001	0.032	3.42	0.00106893	-0.146043	0.0820371	0
25418	3.833	305.009	0.01	8.24	0.00107341	-0.145991	0.0822811	0
28999	8.685	337.168	0.148	4.34	0.00107507	-0.145971	0.0823094	0
60429	8.628	909.001	0.038	3.58	0.00107822	0.145935	0.0824321	0
20494	7.044	263.239	0.623	51.23	0.00107963	-0.145918	0.0824321	1
41657	4.803	470.107	0.006	47.42	0.00108058	0.145907	0.0824321	1
4761	0.682	131.118	0.93	29.42	0.00108857	-0.145815	0.0828904	1
41180	4.919	464.192	0.038	16.44	0.00109014	0.145797	0.0828904	0
58256	9.241	796.078	0.423	8.28	0.00109051	-0.145793	0.0828904	0
4206	2.706	126.094	0.004	3467.65	0.00109696	-0.145719	0.0832809	0
58591	9.377	809.651	0.114	9.82	0.00110173	-0.145665	0.0834035	0
40397	4.867	455.14	0.222	12.21	0.00110232	0.145658	0.0834035	0
63160	9.041	1171.35	0.519	6.93	0.00110252	-0.145656	0.0834035	0
12869	3.737	202.145	0.289	24.7	0.001107	-0.145605	0.0835719	1
6099	5.291	143.071	0.076	6.86	0.00110787	-0.145596	0.0835719	0
36492	8.069	411.321	0.008	7.66	0.0011087	-0.145586	0.0835719	0
59732	8.636	866.522	0.906	40.33	0.00111957	0.145464	0.0842912	0
57849	8.695	780.555	1	457.59	0.00112781	-0.145372	0.0847344	0
23444	6.768	287.626	0.062	17.61	0.00112813	0.145368	0.0847344	0
12583	0.632	200.045	0.066	19.86	0.00113113	0.145335	0.0848591	0
51812	6.818	616.232	0.808	14.26	0.00113353	0.145309	0.0849384	0
28787	0.699	335.095	0.727	3.91	0.00113523	-0.14529	0.0849657	0
32552	6.163	369.239	0.054	6.2	0.00114454	-0.145187	0.0855613	0
31872	8.624	363.164	0.002	4.24	0.00114872	-0.145141	0.0857695	0
12627	5.31	200.095	0.002	3.52	0.00115003	-0.145127	0.0857695	0
35688	2.36	402.212	0.275	10.18	0.00115139	-0.145112	0.0857695	0
51849	4.199	617.047	0.633	4.62	0.00115453	0.145078	0.0859026	0
36600	9.256	412.779	1	101.01	0.00115901	-0.145029	0.0860933	1
26573	4.079	315.081	0.002	8.22	0.00116108	0.145007	0.0860933	0
35983	8.694	405.75	0.224	5.66	0.00116183	-0.144999	0.0860933	0
32623	5.986	370.097	0.036	6.14	0.00116252	0.144991	0.0860933	0
43057	5.007	487.114	0.002	8.49	0.00116582	0.144956	0.0862368	0
24370	7.112	295.228	0.132	14.73	0.0011722	-0.144887	0.0865171	0
59122	9.966	833.65	0.078	6.07	0.00117234	-0.144886	0.0865171	0
59879	9.246	874.066	0.07	5.46	0.00117948	-0.144809	0.0868308	0
34746	9.05	391.782	1	80.46	0.00118198	-0.144783	0.0868308	1
58188	8.792	794.06	0.036	16.01	0.00118231	-0.144779	0.0868308	0
33543	8.466	379.286	0.006	7.79	0.00118255	-0.144777	0.0868308	1
38305	9.174	431.766	0.054	5.11	0.00118344	-0.144767	0.0868308	0
41376	5.313	466.225	0.246	3.34	0.00118654	0.144734	0.0869325	0
47109	7.357	538.387	0.098	28	0.00118757	0.144723	0.0869325	0
13711	3.742	209.976	0.002	10	0.00119499	0.144645	0.0873751	0
30663	6.875	352.246	0.014	29.93	0.00120523	-0.144537	0.088022	1
36390	9.347	410.764	0.004	2.87	0.00121099	-0.144477	0.0883033	0
61981	9.046	1034.43	0.22	5.06	0.00121187	-0.144468	0.0883033	0
7650	9.118	157.084	0.377	3.11	0.00122288	0.144354	0.0890038	0
59120	9.912	833.649	0.337	8.85	0.00123093	-0.144271	0.0894863	0
25786	5.981	308.127	0.631	33.28	0.00123351	0.144245	0.0895711	1
56321	8.451	723.541	0.002	9.26	0.00124309	-0.144147	0.0901641	0
63227	9.052	1179.36	0.124	5.93	0.00124957	-0.144081	0.0904615	0
21402	8.797	270.911	0.259	3.15	0.00125005	0.144077	0.0904615	0
44608	4.906	505.333	0.413	6.87	0.00125488	0.144028	0.0906778	0
58141	4.199	792.24	0.11	3.92	0.0012568	0.144008	0.0906778	0
47738	9.055	548.028	0.94	5.72	0.00125743	-0.144002	0.0906778	0
49241	7.894	571.4	0.008	5.85	0.00125876	-0.143989	0.0906778	0
59613	8.73	858.596	0.016	5.95	0.00126211	-0.143955	0.090816	0
41359	6.384	466.112	0.024	8.22	0.00127255	0.143851	0.0914637	0
1157	1.446	90.055	0.946	8.54	0.00127869	-0.14379	0.091801	0
57791	9.058	778.078	0.609	6.62	0.00128207	-0.143756	0.0919392	0
57344	9.63	760.584	0.004	7.7	0.00128355	-0.143742	0.0919413	0
7783	2.751	158.118	0.006	4.73	0.0012856	0.143722	0.0919842	0
58695	9.049	813.556	0.936	29.11	0.0012918	-0.143661	0.092168	0
59386	9.052	848.046	0.425	15.99	0.00129245	-0.143654	0.092168	0
5811	5.328	140.953	0.01	1.73	0.00129253	-0.143654	0.092168	0
26512	5.589	314.233	0.503	6.42	0.00129404	-0.143639	0.0921723	0
53410	7.436	646.969	0.425	6.18	0.00129662	0.143613	0.0922524	0
27967	2.435	328.211	0.012	5.17	0.00130477	0.143534	0.0927277	0
36594	8.683	412.747	0.094	12.02	0.00131423	-0.143442	0.0932059	0
15455	5.232	224.129	0.547	9.87	0.00131444	0.14344	0.0932059	0
63300	8.855	1189.36	0.1	6.84	0.00131925	-0.143394	0.0934429	0
12793	6.798	201.234	0.291	2.26	0.00132457	-0.143343	0.0936362	0
48830	5.819	565.235	0.008	11.77	0.00132494	0.143339	0.0936362	0
15881	2.648	227.974	0.008	2.59	0.00133066	0.143285	0.0939359	0
44003	4.163	498.235	0.004	5.72	0.00133536	0.14324	0.0941061	0
58105	9.034	790.571	0.184	44.91	0.00133902	-0.143205	0.0941061	1
34670	4.199	391.118	0.517	4.28	0.00133911	0.143204	0.0941061	0
48261	8.682	554.682	0.986	6.3	0.00134056	-0.14319	0.0941061	0
25908	5.229	309.183	0.006	33.37	0.00134067	0.143189	0.0941061	1
14467	5.941	215.939	0.012	2.07	0.00134244	0.143173	0.0941061	0
21597	5.589	272.185	0.269	10.02	0.00134346	-0.143163	0.0941061	0
59934	8.642	877.52	0.299	6.08	0.00134559	0.143143	0.0941512	0
30629	5.499	352.064	0.002	8.23	0.00135453	0.143059	0.0946698	0
25618	7.169	306.301	0.002	27.99	0.00135599	0.143045	0.0946698	0
29403	4.632	341.245	0.194	6.17	0.0013582	-0.143024	0.0947199	0
59534	8.645	854.565	0.463	9.45	0.00136095	0.142998	0.0948071	0
43178	4.484	488.223	0.002	7.89	0.00136464	-0.142964	0.0948646	0
36210	9.075	408.792	0.006	2.76	0.00136544	-0.142957	0.0948646	0
19876	6.148	259.17	0.002	1.46	0.0013667	-0.142945	0.0948646	0
27858	5.314	327.194	0.12	11.75	0.00136776	0.142935	0.0948646	1
41095	4.46	463.195	0.006	5.07	0.00136972	0.142917	0.0948969	0
27320	7.485	322.311	0.06	12.66	0.00138157	-0.142807	0.0956135	0
29593	2.689	343.2	0.379	8.46	0.00139306	-0.142701	0.0963037	0
47704	5.901	547.342	0.126	6.05	0.00140157	0.142624	0.0967235	0
17906	1.86	243.183	0.002	1.26	0.00140219	-0.142618	0.0967235	0
21569	3.737	272.081	0.184	16.96	0.00140384	-0.142603	0.0967319	0
19754	3.384	258.17	0.23	4.09	0.00140728	-0.142572	0.0968642	0
45193	6.818	513.299	0.868	27.99	0.00140999	0.142547	0.0969455	1
50296	4.026	589.225	0.517	7.34	0.00141367	0.142514	0.0970931	0
63102	8.691	1164.32	0.267	6.48	0.00141746	-0.14248	0.0972476	0
3195	8.794	116.986	0.018	3.12	0.00141948	0.142462	0.097281	0
57061	5.315	750.318	0.03	4.71	0.00142413	0.14242	0.0974273	0
59121	9.864	833.65	0.014	11.52	0.00142548	-0.142408	0.0974273	0
4296	2.745	127.038	0.212	4.98	0.00142622	0.142401	0.0974273	0
48604	4.853	561.107	0.004	5.03	0.00143625	0.142312	0.0980069	0
45730	7.472	519.415	0.012	23.23	0.00144145	-0.142265	0.0982245	0
13977	0.735	212.104	0.006	10.16	0.00144254	-0.142256	0.0982245	1
21394	6.779	270.65	0.006	68.48	0.00144686	0.142218	0.0984131	0
63045	8.69	1156.33	0.916	11.95	0.0014548	-0.142148	0.0988466	0
46262	6.214	528.315	0.066	13.31	0.00145701	0.142128	0.098891	0
21021	2.065	267.635	0.002	2.37	0.00146169	-0.142087	0.0991026	0
43359	5.275	490.206	0.273	7.79	0.00146604	0.142049	0.0992911	0
30074	7.537	347.226	0.489	11.2	0.00147089	-0.142007	0.0995135	0
55585	8.473	703.577	1	328.86	0.00147325	-0.141986	0.0995666	1
59813	8.86	871.032	0.066	4.62	0.0014758	-0.141964	0.099633	0
34241	5.567	386.29	0.687	10.81	0.00147903	-0.141936	0.099745	1
43843	4.616	496.255	0.032	8.9	0.00148081	0.141921	0.0997589	0
26511	4.969	314.233	0.675	14.3	0.00148249	-0.141906	0.0997659	2
35689	2.498	402.213	0.339	13.98	0.00148754	-0.141863	0.0999142	0
5854	0.69	141.066	0.008	7.14	0.00148785	-0.14186	0.0999142	1
58403	9.049	801.561	0.076	9.47	0.00149727	-0.141779	0.100441	0
3210	1.01	117.02	0.403	66.88	0.00149935	-0.141761	0.100474	0
9185	6.883	170.118	0.054	9.89	0.00150299	-0.14173	0.100612	0
37770	9.988	425.815	0.008	8.56	0.00150581	-0.141706	0.100694	0
47675	5.311	547.166	0.343	2.83	0.00150755	0.141691	0.100704	0
60489	8.642	913.51	0.246	6.94	0.00151337	0.141642	0.100954	0
59210	8.67	838.542	0.12	8.86	0.00151448	0.141632	0.100954	0
54129	5.216	664.454	0.084	6.02	0.00151957	-0.141589	0.101104	0
11964	0.636	194.118	0.483	7.7	0.0015202	0.141584	0.101104	0
19737	3.745	258.1	0.192	6.77	0.00152152	-0.141573	0.101104	0
2201	3.922	104.071	0.004	1.93	0.00152541	-0.14154	0.101257	0
41179	4.613	464.191	0.016	9.91	0.00153262	0.141479	0.101629	0
14328	8.795	214.919	0.03	2.64	0.00153575	0.141453	0.101661	0
32862	8.493	372.749	0.87	14.08	0.00153849	-0.14143	0.101661	0
40173	6.814	452.278	0.567	61.64	0.00153862	0.141429	0.101661	1
38030	5.235	429.132	0.004	9.07	0.00153978	0.141419	0.101661	0
18535	2.74	248.15	0.004	4.49	0.00154153	-0.141405	0.101661	0
58498	8.736	805.557	0.004	51.17	0.00154327	-0.14139	0.101661	0
39660	4.199	446.592	0.896	12.96	0.00154432	0.141382	0.101661	0
45468	5.877	517.216	0.008	10.63	0.00155737	0.141273	0.102413	0
38873	4.672	438.321	0.202	7.07	0.0015605	-0.141248	0.102471	0
42634	2.703	481.999	0.002	2.47	0.00156148	-0.141239	0.102471	0
26293	4.355	312.217	0.018	11.5	0.00156755	0.14119	0.102674	0
41626	7.337	469.387	0.002	19.79	0.00156834	-0.141183	0.102674	0
43069	4.865	487.167	0.86	17.23	0.00156947	0.141174	0.102674	1
43764	4.199	495.104	0.617	4.1	0.00157106	0.141161	0.102674	0
42003	6.813	474.261	0.343	15.07	0.00158004	0.141087	0.103155	0
48771	5.874	564.207	0.018	8.99	0.00158704	0.14103	0.103505	0
36573	7.055	412.296	0.172	7.11	0.00158979	-0.141008	0.103518	0
29728	5.649	344.281	0.996	22.9	0.0015927	-0.140985	0.103518	1
21599	4.791	272.186	0.016	7.38	0.00159334	-0.140979	0.103518	0
48709	5.57	563.22	0.016	5.69	0.00159376	0.140976	0.103518	0
39045	6.006	440.328	0.004	7.03	0.00159683	-0.140951	0.103528	0
16190	5.542	230.249	1	144.87	0.00159718	-0.140948	0.103528	1
38666	7.68	435.345	0.004	12.89	0.00159939	-0.14093	0.103565	0
56087	5.298	717.158	0.016	1.62	0.00160203	0.140909	0.10363	0
31654	2.489	361.103	0.004	3.97	0.00160628	-0.140875	0.103799	0
23161	2.618	285.127	0.002	4.16	0.00161237	-0.140826	0.104086	0
13572	1.736	208.976	0.583	16.27	0.00162502	-0.140725	0.104797	0
32527	6.142	369.175	0.02	7.27	0.00163127	0.140676	0.105092	0
12874	0.853	202.181	0.601	389.98	0.00163307	-0.140662	0.105102	1
39489	0.633	445.087	0.988	15.93	0.00163924	0.140613	0.105392	0
7665	8.792	157.084	0.974	4.46	0.00164418	0.140574	0.105602	0
63063	9.047	1159.35	0.88	12.66	0.00164832	-0.140541	0.105761	0
7298	1.448	154.047	0.301	5.36	0.00165759	-0.140469	0.106248	0
17166	6.812	237.628	0.701	8.37	0.00166185	0.140436	0.106391	0
58663	8.782	812.557	0.2	14.91	0.00166318	-0.140425	0.106391	0
35544	8.705	400.269	0.002	8.57	0.00166651	-0.1404	0.106497	0
11222	0.767	187.131	0.138	2.66	0.00167113	0.140364	0.106579	0
46453	5.847	531.194	0.096	6.67	0.00167115	0.140364	0.106579	0
45825	5.955	521.22	0.014	7.25	0.00168213	0.140279	0.107171	0
47943	6.836	550.797	0.008	6.25	0.00168446	0.140261	0.107212	0
63078	9.045	1161.36	0.018	6.63	0.00168618	-0.140248	0.107213	0
58053	8.465	788.527	0.006	11.28	0.00168808	-0.140233	0.107227	0
46372	0.626	530.081	0.383	2.05	0.00169045	0.140215	0.10727	0
20981	6.75	267.145	0.002	4.53	0.00170069	0.140137	0.107761	1
20754	0.6	265.213	0.347	8.16	0.00170159	-0.14013	0.107761	0
35513	0.862	400.028	0.543	3.6	0.00171881	-0.139999	0.108743	0
55396	7.466	697.491	0.772	11.36	0.00172449	-0.139956	0.108993	0
26296	4.221	312.218	0.16	15.44	0.00172897	0.139923	0.109155	0
42651	4.867	482.148	0.224	9.06	0.00173246	0.139897	0.109155	0
31890	4.573	363.216	0.038	7.37	0.00173256	0.139896	0.109155	0
59662	8.689	861.507	0.044	7.92	0.00173393	-0.139885	0.109155	0
58680	9.149	813.063	0.629	9.96	0.00174019	-0.139839	0.10944	0
20120	5.76	261.131	0.046	0.97	0.00174829	-0.139778	0.109841	0
16457	1.579	232.155	0.992	23.64	0.00175369	-0.139738	0.110071	1
53579	4.884	650.059	0.03	7.67	0.00175567	0.139724	0.110086	0
62800	5.523	1124.87	0.032	1.5	0.00176238	-0.139674	0.110398	0
18119	5.097	245.165	0.002	13.79	0.0017692	0.139624	0.110635	0
19900	0.63	259.574	0.625	25.21	0.00176966	0.139621	0.110635	0
35018	8.965	394.752	0.918	5.17	0.00177626	-0.139572	0.110938	0
35893	9.253	404.789	1	17.81	0.0017807	-0.13954	0.111087	1
24140	2.425	293.192	0.385	11.63	0.00178215	-0.139529	0.111087	0
25172	1.825	302.197	0.327	32.23	0.00178574	-0.139503	0.111161	0
57708	9.036	774.573	0.172	4.15	0.00178692	-0.139494	0.111161	0
30708	4.048	353.044	0.002	10.3	0.00178858	-0.139482	0.111161	0
13488	1.735	207.999	0.174	5.15	0.00180643	-0.139353	0.11216	0
56860	4.198	742.245	0.108	5.15	0.00181193	0.139313	0.112301	0
44487	9.107	503.827	0.391	4.33	0.00181225	0.139311	0.112301	0
58667	9.869	812.611	0.002	10.05	0.00181816	0.139269	0.112557	0
42779	8.846	483.381	0.216	5.89	0.00182203	-0.139241	0.112682	0
58870	9.052	821.546	0.146	13.9	0.00182373	-0.139229	0.112682	0
14557	4.301	216.16	0.066	7.14	0.00183017	-0.139183	0.112868	0
59884	8.632	874.524	0.064	11.88	0.0018303	0.139182	0.112868	0
25195	2.719	302.948	0.154	2.98	0.00183239	-0.139167	0.112887	0
63005	9.035	1151.86	0.03	12.12	0.00183431	-0.139153	0.112895	0
1724	0.715	99.0435	0.82	4.55	0.00183932	-0.139118	0.113094	1
53491	7.192	648.046	0.814	38.32	0.00184454	-0.139081	0.113305	0
59745	9.177	867.076	0.19	7.13	0.00184699	-0.139063	0.113342	0
18532	2.855	248.149	0.008	10.89	0.00185016	-0.139041	0.113342	0
19688	6.243	257.227	0.874	10.22	0.00185051	0.139039	0.113342	1
11123	1.65	186.185	0.008	2.95	0.00185483	-0.139008	0.113387	0
48100	4.199	553.134	0.974	12.58	0.00185536	0.139004	0.113387	0
19614	1.734	257.027	0.928	4.54	0.00185661	-0.138996	0.113387	1
40463	6.749	455.314	0.752	12.56	0.00186193	0.138958	0.113603	1
37901	7.478	427.288	0.948	35.35	0.00186783	0.138917	0.113853	1
38078	6.103	429.301	0.114	10.51	0.00187037	-0.138899	0.113898	1
54065	8.486	663.337	0.012	11.69	0.00187582	0.138861	0.114121	0
295	0.714	69.0333	0.615	3.75	0.00188224	-0.138817	0.114402	1
22986	7.472	283.264	0.016	12.69	0.00190811	-0.138638	0.115843	0
16128	2.791	230.025	0.016	6.57	0.0019096	-0.138628	0.115843	0
30684	7.897	352.358	0.357	15.2	0.00191195	-0.138612	0.115861	0
25254	3.33	303.193	0.024	4.97	0.00191356	0.138601	0.115861	0
59319	9.044	844.539	0.984	31.29	0.00192287	-0.138537	0.116203	0
8231	1.283	161.981	0.351	44.6	0.00192288	0.138537	0.116203	0
42001	4.657	474.244	0.136	6.64	0.00192651	-0.138512	0.116312	0
54333	7.439	668.618	0.236	7.7	0.00193209	-0.138474	0.116516	0
23623	6.454	289.132	0.006	7.17	0.00193357	-0.138464	0.116516	0
41624	8.249	469.366	0.317	66.52	0.00193781	-0.138436	0.116524	0
57054	8.553	750.048	0.313	6.32	0.00193823	-0.138433	0.116524	0
46807	4.199	535.122	0.337	4.66	0.00193922	0.138426	0.116524	0
23328	6.783	286.626	0.822	14.8	0.00194216	0.138406	0.11659	0
42937	5.65	485.254	0.032	4.82	0.00194596	-0.138381	0.116621	0
38507	9.918	433.797	0.002	5.23	0.00194636	-0.138378	0.116621	0
21346	1.863	270.09	0.014	5.38	0.00195568	-0.138315	0.117011	0
11430	4.382	189.149	0.04	7.15	0.00195654	0.13831	0.117011	0
9662	3.769	174.113	0.108	9.44	0.00196649	-0.138243	0.117494	0
35774	5.197	403.177	0.028	5.45	0.00197576	0.138181	0.117913	0
46601	6.807	532.781	0.012	4.65	0.00198161	0.138143	0.117913	0
9262	1.072	170.982	0.002	38.68	0.00198208	0.13814	0.117913	1
5415	1.637	137.046	0.403	12.07	0.00198232	-0.138138	0.117913	0
32043	8.791	365.106	0.02	2.07	0.00198354	0.13813	0.117913	0
59568	7.941	856.288	0.038	0.97	0.00198564	-0.138116	0.117913	0
37811	10.878	426.313	0.02	2.93	0.00198658	-0.13811	0.117913	0
27216	7.488	321.211	0.341	14.95	0.00198838	-0.138098	0.117913	1
25262	2.091	303.2	0.002	69.11	0.00199813	-0.138034	0.118381	0
41831	2.709	472.164	0.002	8.24	0.00200084	0.138016	0.118405	0
31616	6.212	360.364	0.004	9415.13	0.00200227	-0.138006	0.118405	0
22296	7.689	278.245	0.006	4.26	0.00200414	-0.137994	0.118405	0
24335	7.685	295.153	0.002	1.42	0.00202564	-0.137854	0.119471	0
60870	9.244	938.54	0.305	7.7	0.00202595	-0.137852	0.119471	0
40231	6.314	453.165	0.002	7.63	0.00203222	0.137811	0.119509	0
31883	7.534	363.199	0.088	5.46	0.00203268	-0.137808	0.119509	0
24141	2.283	293.192	0.319	14.06	0.00203322	-0.137805	0.119509	0
59142	8.884	834.598	0.03	13.61	0.00203414	-0.137799	0.119509	0
25764	1.748	308.019	0.028	2.83	0.00204947	-0.1377	0.120293	0
33250	7.192	376.32	0.006	17.51	0.00205127	-0.137688	0.120293	0
37970	5.336	428.301	0.002	10.78	0.00205606	-0.137658	0.120379	0
42650	5.421	482.144	0.012	7.06	0.00205655	0.137655	0.120379	0
35394	8.693	398.764	1	466.84	0.00205954	-0.137635	0.120443	1
33581	0.633	380.109	0.878	22.45	0.00207402	0.137543	0.121053	0
16173	5.188	230.176	0.255	9.24	0.00207631	-0.137529	0.121053	1
31984	8.282	364.258	0.784	7.95	0.0020775	-0.137521	0.121053	0
45793	6.809	520.784	0.735	6.77	0.0020776	0.13752	0.121053	0
36736	4.461	414.109	0.01	6.41	0.00208732	-0.137459	0.121507	0
50703	6.815	596.249	0.052	14.25	0.00209627	0.137402	0.121916	0
19003	5.184	252.158	0.036	11.04	0.00209845	-0.137389	0.121932	0
36277	5.039	409.274	0.002	7.34	0.00210416	-0.137353	0.12204	0
44801	8.559	507.715	0.677	4.35	0.00210671	0.137337	0.12204	0
23245	4.865	285.989	0.024	3.22	0.00210723	-0.137334	0.12204	0
2873	5.289	113.064	0.006	2.22	0.00210802	-0.137329	0.12204	0
18174	2.563	245.985	0.036	5.28	0.00211392	0.137292	0.12227	0
43572	6.812	492.777	0.018	3.31	0.00211809	0.137266	0.1224	0
44155	5.715	500.151	0.267	23.32	0.00212437	0.137227	0.122562	0
32740	8.473	371.266	1	49.5	0.00212477	-0.137224	0.122562	1
32413	5.881	368.096	0.008	4.12	0.00213094	-0.137186	0.122806	0
45073	5.421	511.289	0.004	10.23	0.00214017	-0.137129	0.123226	1
53460	7.422	647.471	0.004	47.1	0.00214299	0.137111	0.123231	0
23815	1.634	291.07	0.068	6.99	0.00214414	-0.137104	0.123231	0
12876	5.023	202.217	0.162	9.36	0.00215087	-0.137063	0.123372	0
32084	7.531	365.203	0.814	6.77	0.00215376	-0.137045	0.123372	1
38413	4.533	432.94	0.002	14.63	0.00215434	-0.137042	0.123372	0
41047	7.978	462.452	0.13	4.94	0.00215724	-0.137024	0.123372	0
23704	0.632	290.077	0.984	72.11	0.00215739	0.137023	0.123372	0
54310	7.192	668.018	0.427	13.39	0.00215827	-0.137017	0.123372	0
44154	5.743	500.151	0.253	23.94	0.00217439	0.136919	0.124181	0
58644	9.764	811.602	0.128	11.31	0.00218134	-0.136877	0.124466	0
19285	6.388	254.249	0.018	34.74	0.00218611	-0.136848	0.124626	0
43201	6.109	488.355	0.391	9.45	0.0021967	-0.136784	0.125117	0
43733	6.821	494.326	1	1734.55	0.00220015	0.136763	0.125201	1
53515	7.386	648.612	0.196	4.14	0.00221731	-0.13666	0.126065	0
8528	1.549	163.977	0.281	6.24	0.00222025	0.136643	0.126118	0
42868	8.942	484.739	0.008	6.39	0.0022229	0.136627	0.126156	0
26423	4.968	313.216	0.687	5.75	0.00222873	0.136592	0.126374	1
22868	8.795	282.906	0.565	4.7	0.00223153	0.136575	0.12642	0
28609	4.862	333.215	0.006	3.25	0.0022383	-0.136535	0.12669	0
33074	6.251	375.083	0.006	2.21	0.00225045	-0.136463	0.127264	0
12394	4.777	198.15	0.635	10.9	0.00225515	-0.136436	0.127416	1
39953	1.737	450.015	0.056	2.96	0.00226099	-0.136401	0.127619	0
27538	7.578	324.327	0.669	28.29	0.00226277	-0.136391	0.127619	0
39089	4.859	441.154	0.038	6.44	0.0022679	0.136361	0.127795	0
55956	8.061	713.445	0.038	4.69	0.00227811	0.136301	0.128255	0
16404	1.735	232.005	0.012	3.67	0.00228249	-0.136276	0.128255	0
5155	5.289	134.959	0.03	2.44	0.00228518	-0.13626	0.128255	0
51887	7.573	617.46	0.032	11.12	0.00228856	-0.13624	0.128255	0
28341	2.597	331.097	0.012	3.6	0.00229158	-0.136223	0.128255	0
15869	2.569	227.939	0.625	2.39	0.00229171	0.136222	0.128255	0
11217	4.483	187.122	0.002	14.3	0.0022932	-0.136213	0.128255	0
18496	1.731	247.999	0.052	3.72	0.00229418	-0.136208	0.128255	0
41919	4.878	473.133	0.018	37.71	0.00229445	0.136206	0.128255	0
22022	2.411	276.181	0.01	3.28	0.0022963	-0.136196	0.128255	0
24194	0.631	294.004	1	65.79	0.00229963	0.136176	0.128328	1
52075	4.874	621.044	0.034	4.44	0.00230896	0.136122	0.128735	0
58550	9.147	807.575	0.976	28.81	0.00233149	-0.135993	0.12977	0
20232	0.631	261.978	0.505	4.8	0.00233162	0.135992	0.12977	0
39006	4.199	440.113	0.557	11.46	0.0023378	0.135957	0.129985	0
23953	2.694	291.937	0.102	0.63	0.00234128	0.135937	0.129985	0
26436	4.971	313.249	0.034	6.37	0.00234163	-0.135935	0.129985	0
58499	8.614	805.558	0.004	310.63	0.00237374	-0.135754	0.131652	0
23230	2.663	285.692	0.01	11.54	0.00237952	-0.135722	0.131857	0
59802	9.254	870.552	0.968	13.76	0.00239105	-0.135657	0.132381	0
19646	6.455	257.107	0.16	3.48	0.0024021	-0.135596	0.132622	0
43428	6.306	491.146	0.054	5.52	0.00240314	0.13559	0.132622	0
8961	1.299	168.98	0.028	3.51	0.00240373	0.135586	0.132622	0
46226	4.709	527.757	0.006	4.84	0.00240388	-0.135586	0.132622	0
15439	1.72	224.129	0.018	5.76	0.00240586	-0.135575	0.132622	0
12871	4.302	202.145	0.267	10.94	0.00242014	-0.135496	0.133293	0
27217	7.525	321.211	0.01	10.02	0.00243568	-0.13541	0.134032	1
62901	2.658	1138.88	0.002	0.71	0.00244124	0.13538	0.134203	0
58613	9.757	810.598	0.727	19.27	0.00244301	-0.13537	0.134203	0
13808	5.316	211.065	0.002	24.05	0.00246129	-0.13527	0.13509	0
6467	2.25	146.118	0.984	25.5	0.00247015	0.135222	0.135459	0
37728	9.889	425.309	0.034	14.64	0.00247552	-0.135193	0.135636	0
59269	9.165	841.57	0.992	19.96	0.0024811	-0.135163	0.135824	0
22376	1.729	279.072	0.006	1.76	0.00249605	-0.135083	0.136392	0
60304	8.672	900.526	0.251	5.76	0.00249643	0.135081	0.136392	0
19764	5.807	258.207	0.024	7.39	0.00250028	-0.13506	0.136392	0
46690	5.87	533.366	0.016	12.93	0.00250336	0.135043	0.136392	0
43734	7.609	494.422	0.068	4.94	0.00250489	-0.135035	0.136392	0
63231	5.471	1179.9	0.134	2.49	0.00250591	0.13503	0.136392	0
3887	1.228	123.055	0.984	9.05	0.00250778	-0.13502	0.136392	1
8536	3.153	163.977	0.317	17.89	0.00251194	0.134998	0.136392	0
26953	4.996	318.596	0.511	5.75	0.00251281	0.134993	0.136392	0
25288	6.884	303.648	1	240.41	0.00251298	0.134992	0.136392	0
3528	3.529	120.044	0.629	7.86	0.0025261	-0.134922	0.136986	1
58277	9.478	796.617	0.076	15.89	0.00253131	-0.134895	0.137151	0
47601	8.696	546.682	0.958	4.81	0.00253795	-0.134859	0.137394	0
14580	1.798	216.911	0.01	2.66	0.00255642	0.134762	0.138276	0
49755	5.797	580.201	0.014	7.68	0.00258142	0.134632	0.13934	0
20776	6.949	265.656	0.311	7	0.00258174	0.13463	0.13934	0
24597	0.632	297.562	0.261	12.78	0.00258268	0.134625	0.13934	0
18131	0.514	245.234	0.401	5.15	0.00258576	-0.134609	0.139387	0
47221	6.788	540.307	0.419	29.5	0.00260002	0.134535	0.13997	1
42467	9.261	479.825	0.954	6.72	0.002601	-0.13453	0.13997	0
59734	8.886	866.528	0.028	7.75	0.00261844	-0.13444	0.140458	0
14583	2.541	216.911	0.004	2.75	0.00262139	0.134425	0.140458	0
26924	4.506	318.191	0.04	8.73	0.00262242	-0.13442	0.140458	0
22045	5.504	276.233	0.152	15.04	0.00262458	-0.134409	0.140458	0
12325	2.517	197.129	0.79	6.52	0.0026247	0.134408	0.140458	1
2243	1.32	104.107	0.002	3.7	0.00262478	-0.134408	0.140458	0
29181	7.477	339.183	0.561	7.24	0.00262593	-0.134402	0.140458	1
8511	1.39	163.976	0.06	13.81	0.00262778	0.134392	0.140458	0
27300	2.463	322.195	0.038	3.54	0.00263174	-0.134372	0.140551	0
55201	10.174	691.527	0.567	4.3	0.00263477	-0.134357	0.140594	0
35366	9.076	398.29	0.864	5.47	0.00263823	-0.134339	0.140614	0
58646	9.901	811.661	0.05	14.8	0.00263957	-0.134332	0.140614	0
58478	8.631	804.554	1	700.03	0.00264697	-0.134294	0.140889	0
46688	5.714	533.361	0.154	15.9	0.00264933	0.134282	0.140897	0
11126	1.457	186.185	0.275	4.87	0.00265691	-0.134244	0.14111	0
19753	1.99	258.17	0.168	6.06	0.00265779	-0.134239	0.14111	0
44149	5.027	500.116	0.02	4.32	0.00266524	0.134202	0.141387	0
28223	4.51	329.968	0.006	4.07	0.00268391	-0.134108	0.142258	0
19185	8.795	253.946	0.004	3.1	0.00268721	0.134091	0.142314	0
58405	7.451	801.576	0.938	41.02	0.00269457	0.134054	0.142552	2
14844	8.794	219.054	0.345	3.02	0.00269634	0.134045	0.142552	0
36626	4.199	413.101	0.275	4.99	0.00269845	0.134035	0.142552	0
40336	6.996	454.295	1	151.97	0.00271044	0.133975	0.143066	1
44133	8.559	499.724	0.964	5.1	0.0027151	0.133952	0.143193	0
58390	9.051	801.224	0.315	4.08	0.0027196	-0.13393	0.143229	0
32656	6.927	370.296	0.006	10.71	0.0027203	-0.133926	0.143229	0
48045	4.933	552.061	0.028	8.39	0.00272659	0.133895	0.14333	0
12241	1.734	196.951	0.078	3.99	0.00272675	-0.133894	0.14333	0
21747	7.127	273.257	0.022	13.7	0.00273273	0.133865	0.143526	0
28685	0.806	334.079	0.088	2.93	0.00273893	-0.133834	0.143666	0
8221	1.552	161.981	0.072	6.5	0.0027403	0.133827	0.143666	0
60066	9.231	885.552	0.637	8.54	0.00274891	-0.133785	0.143666	0
2860	0.977	113.031	0.002	8.32	0.00275071	-0.133776	0.143666	1
23126	5.72	285.04	0.054	7.24	0.00275271	-0.133766	0.143666	0
58363	8.875	799.564	0.024	4.29	0.00275276	-0.133766	0.143666	0
2006	9.186	102.128	0.046	3.5	0.00275284	0.133766	0.143666	0
26745	2.598	316.213	0.002	3.38	0.00275353	-0.133762	0.143666	0
29949	7.578	346.308	0.158	24.59	0.00276759	-0.133693	0.144281	0
2014	9.132	102.128	0.413	3.54	0.00279455	0.133562	0.145426	0
47700	4.876	547.335	0.08	4.97	0.00279631	0.133554	0.145426	0
41461	6.505	467.276	0.006	12.21	0.00279642	0.133553	0.145426	0
57291	9.092	758.575	0.026	10.53	0.00281859	-0.133446	0.146458	0
8086	7.215	160.617	0.615	21.93	0.00282574	-0.133412	0.146709	0
5231	4.382	135.117	0.138	11.34	0.00283752	0.133356	0.14705	0
59935	9.052	877.546	0.012	6.57	0.00283923	-0.133348	0.14705	0
5460	1.009	137.533	0.968	33.71	0.00283946	-0.133346	0.14705	0
15625	1.735	225.969	0.212	8.96	0.0028438	-0.133326	0.14705	0
19028	6.506	252.626	0.295	6.2	0.00284486	0.133321	0.14705	0
43612	0.802	493.288	0.004	4.17	0.00284622	-0.133314	0.14705	0
12885	0.867	202.641	0.174	2.69	0.00286116	-0.133243	0.147546	0
22751	1.734	281.95	0.014	2.17	0.00286118	-0.133243	0.147546	0
56287	8.474	722.549	0.976	13.08	0.00286391	-0.13323	0.147546	0
42564	4.845	481.105	0.006	5.49	0.00286512	0.133225	0.147546	0
38920	4.861	439.093	0.012	3.21	0.00288528	0.133129	0.148463	0
2864	1.301	113.035	0.972	10.01	0.00289411	-0.133088	0.148727	1
43168	5.191	488.119	0.467	5.54	0.0028969	0.133075	0.148727	0
47964	5.802	551.183	0.004	9.8	0.00289899	0.133065	0.148727	0
26738	2.356	316.178	0.01	160.9	0.00289979	-0.133061	0.148727	0
14435	4.065	215.176	0.014	4.46	0.00291026	-0.133013	0.149143	0
26696	0.615	315.975	0.018	3.06	0.00292918	-0.132925	0.149772	0
8533	3.022	163.977	0.106	11.74	0.00293035	0.132919	0.149772	0
45372	4.198	516.132	0.216	6.54	0.00293179	0.132912	0.149772	0
52793	7.197	634.542	0.992	415.72	0.00293415	-0.132901	0.149772	1
48708	5.862	563.22	0.018	4.15	0.00293434	0.132901	0.149772	0
8524	1.675	163.977	0.379	8.47	0.00294021	0.132873	0.149879	0
36729	0.632	414.047	0.992	121.66	0.00294117	0.132869	0.149879	0
8058	2.864	160.097	0.455	7.01	0.00294646	-0.132845	0.150028	0
44007	5.548	498.27	0.008	10.49	0.00295107	0.132823	0.150142	0
23653	4.909	289.216	0.441	11.76	0.00295959	0.132784	0.150393	1
56441	8.48	727.562	0.038	12.09	0.00296074	-0.132779	0.150393	0
53805	7.193	656.037	0.98	136.82	0.00299285	-0.132632	0.151902	1
41485	8.643	467.752	0.08	4.06	0.00299597	0.132618	0.151939	0
36320	4.2	410.093	0.13	3.14	0.00300056	0.132597	0.15205	0
29503	5.508	342.265	0.002	17.34	0.00300941	-0.132557	0.152376	1
5487	3.528	138.055	0.918	9.08	0.00302106	-0.132504	0.152844	1
23300	2.064	286.202	0.232	5.7	0.00303432	-0.132445	0.153393	0
25635	9.332	306.877	0.056	3.23	0.00303785	0.132429	0.153449	0
8515	1.636	163.977	0.01	17.44	0.00304073	0.132416	0.153472	0
15770	5.316	227.038	0.002	12.72	0.00304483	0.132398	0.153557	0
38970	7.016	439.319	0.082	14.81	0.00304771	-0.132385	0.153572	0
36347	5.541	410.289	0.004	9.66	0.00305214	-0.132365	0.153572	0
29594	2.783	343.2	0.373	8.29	0.00305591	-0.132348	0.153572	0
10984	2.263	185.129	0.962	7.04	0.00305973	-0.132331	0.153572	1
33304	3.69	376.995	0.06	15.76	0.00305989	-0.13233	0.153572	0
41256	9.057	464.749	1	14.76	0.00306246	-0.132319	0.153572	0
29858	4.273	345.273	0.014	4.68	0.00306589	-0.132304	0.153572	0
56408	8.474	726.561	0.81	47.02	0.0030668	-0.1323	0.153572	0
13012	0.629	203.151	0.982	410.15	0.00306694	0.132299	0.153572	1
9410	0.721	172.133	0.349	8.45	0.00307547	-0.132261	0.153878	0
60151	8.698	891.516	0.122	9.17	0.00307895	0.132246	0.15393	0
59063	9.063	830.561	0.01	18.82	0.00308288	-0.132228	0.154006	0
7264	4.839	153.948	0.002	6.41	0.00309034	-0.132195	0.154256	0
44480	8.836	503.471	0.146	2.81	0.00309401	-0.132179	0.154318	0
30318	5.082	349.237	0.784	10.13	0.00309816	0.132161	0.154404	0
11114	6.88	186.149	0.004	3.07	0.00310299	-0.132139	0.154523	0
38329	4.561	432.076	0.002	3.71	0.00311227	-0.132099	0.154829	0
60411	9.185	908.044	0.048	5.66	0.00311402	-0.132091	0.154829	0
50562	0.475	593.693	0.132	1.56	0.00312369	-0.132049	0.155053	0
26276	6.285	312.161	0.395	17.62	0.00312437	0.132046	0.155053	1
51337	7.239	608.324	0.944	15.29	0.00312586	0.132039	0.155053	0
24139	2.101	293.192	0.311	10.23	0.00313142	-0.132015	0.155207	0
31623	4.194	360.638	0.667	17.42	0.0031384	-0.131984	0.155432	0
13376	3.829	206.738	0.056	1.1	0.00314447	-0.131958	0.155611	0
62684	7.054	1111.63	0.01	3.82	0.00314809	0.131942	0.155668	0
58322	9.056	798.557	0.092	5.7	0.00315135	-0.131928	0.155708	0
45948	5.209	523.002	0.01	6.7	0.00315407	-0.131916	0.155721	0
61213	7.437	961.187	0.461	3.54	0.00315765	0.131901	0.155777	0
3954	0.849	124.05	0.014	11.19	0.00316481	-0.13187	0.156009	0
15314	7.11	223.168	0.002	2.13	0.00317746	-0.131815	0.156245	0
4125	4.132	125.115	0.307	7.51	0.00317952	-0.131806	0.156245	0
49086	4.199	569.063	0.719	4.87	0.00317978	0.131805	0.156245	0
21023	7.264	267.647	0.036	21.18	0.00318207	0.131795	0.156245	0
9285	8.792	171.063	0.94	3.08	0.00318426	0.131786	0.156245	0
48763	2.315	564.184	0.002	28.64	0.0031844	-0.131785	0.156245	0
10429	1.735	181.03	0.034	1.73	0.00319841	0.131725	0.156811	0
61712	7	1007.15	0.06	2.63	0.00321004	0.131676	0.15726	0
40672	5.308	458.134	0.032	8.16	0.00321914	0.131637	0.157584	0
19366	6.231	255.091	0.194	4.37	0.00322729	-0.131602	0.157861	0
23514	4.156	288.217	0.331	9.4	0.00324792	0.131515	0.158747	0
39009	2.711	440.139	0.004	31.81	0.00325763	-0.131474	0.158892	0
46510	6.815	531.776	0.122	4.4	0.00325963	0.131465	0.158892	0
10691	5.368	183.102	0.17	27.51	0.00326174	0.131457	0.158892	0
33512	5.462	379.194	0.1	7.53	0.00326203	0.131455	0.158892	0
35866	5.714	404.28	0.056	9.59	0.00326737	0.131433	0.158892	0
5229	9.061	135.117	0.493	6.11	0.00327139	-0.131416	0.158892	0
9752	1.733	175.021	0.299	4.67	0.00327171	-0.131415	0.158892	0
45645	4.867	519.192	0.739	9.99	0.00327388	0.131406	0.158892	0
23724	2.231	290.16	0.006	6.38	0.00327448	-0.131403	0.158892	0
38024	4.893	429.126	0.008	2.49	0.00327595	0.131397	0.158892	0
56384	8.473	725.558	1	101.91	0.00328214	-0.131371	0.158933	1
24766	0.633	299.064	0.387	9.93	0.00328294	0.131368	0.158933	0
26937	6.58	318.242	0.074	102.59	0.00328571	-0.131356	0.158933	0
44708	7.965	506.479	0.016	18.92	0.00328875	-0.131343	0.158933	0
10337	0.636	180.087	0.978	23.34	0.00328933	0.131341	0.158933	1
26799	5.72	317.063	0.022	6.95	0.00329432	-0.13132	0.15903	0
4200	2.461	126.091	0.006	8.54	0.00329636	-0.131312	0.15903	0
27881	4.679	327.228	0.008	7.6	0.00330667	-0.131269	0.159272	0
59158	8.632	835.538	0.892	40.95	0.00330786	0.131264	0.159272	0
43405	7.197	490.896	0.719	36.92	0.00330889	-0.13126	0.159272	0
18357	1.735	247.049	0.056	3.98	0.00332452	-0.131195	0.159682	0
42228	4.896	477.128	0.128	5.07	0.00332457	0.131195	0.159682	0
18265	2.556	246.171	0.984	100.81	0.00332498	-0.131193	0.159682	1
31036	7.213	355.333	0.301	34.19	0.00333602	-0.131147	0.160091	0
44324	0.865	502.148	0.116	3.08	0.00334328	0.131117	0.16027	0
11360	1.734	189.008	0.996	83.33	0.0033448	-0.131111	0.16027	1
10441	7.564	181.05	0.014	2.74	0.00335627	-0.131064	0.160645	0
43915	10.959	497.237	0.092	3.11	0.00335903	-0.131053	0.160645	0
30181	7.044	348.239	0.106	28.83	0.00336392	-0.131033	0.160645	0
16483	6.641	232.225	0.331	12.24	0.00336631	-0.131023	0.160645	0
673	0.84	84.081	0.792	132.14	0.0033673	-0.131019	0.160645	1
45811	4.199	521.128	0.104	4.41	0.00336784	0.131017	0.160645	0
21647	8.489	272.909	0.032	2.46	0.00337104	0.131004	0.160677	0
54182	7.189	665.023	0.106	8.06	0.00338624	-0.130942	0.16128	0
18715	6.809	249.186	0.617	4.74	0.00339813	-0.130894	0.161725	1
40649	8.692	457.82	0.944	4.9	0.00340637	-0.13086	0.161996	0
58299	8.882	797.581	0.11	19.13	0.0034139	-0.13083	0.162211	0
24535	6.208	297.132	0.032	5.92	0.00341603	-0.130821	0.162211	0
18071	1.301	245.077	0.928	6.46	0.00342085	-0.130802	0.162319	1
36013	4.199	406.144	0.024	7.03	0.00342816	0.130772	0.162475	0
44238	4.62	501.214	0.026	5.47	0.00342928	0.130768	0.162475	0
33780	0.649	382.061	0.068	2.08	0.00343723	-0.130736	0.162704	0
18441	7.198	247.243	0.172	24.59	0.0034451	-0.130704	0.162704	0
36273	7.304	409.271	0.006	3.24	0.00344752	0.130695	0.162704	0
27316	6.699	322.273	0.074	39.37	0.00344842	-0.130691	0.162704	0
43070	5.188	487.175	0.004	5.19	0.00344866	0.13069	0.162704	0
45575	0.634	518.14	0.98	10.28	0.00345124	0.13068	0.162704	0
39294	5.498	443.177	0.002	5.43	0.00345226	0.130676	0.162704	1
20557	0.725	263.992	0.387	4.24	0.00345463	-0.130666	0.162704	0
21757	6.948	273.648	0.162	28.83	0.00345832	0.130652	0.162757	0
21748	7.097	273.258	0.018	17.12	0.00346319	0.130632	0.162865	0
43072	4.201	487.187	0.006	5.52	0.00347518	0.130585	0.163308	0
44570	5.307	505.137	0.18	4.77	0.0034792	0.130569	0.163376	0
21459	5.719	271.089	0.066	3.74	0.00348708	-0.130537	0.163516	0
26651	3.511	315.678	0.12	5.27	0.00348807	-0.130533	0.163516	0
48685	8.633	562.682	1	5.54	0.00348993	0.130526	0.163516	0
30185	5.936	348.257	0.242	10.57	0.00349488	0.130507	0.163533	0
30226	5.95	348.992	0.004	4.25	0.00349546	-0.130504	0.163533	0
55666	7.559	705.512	0.03	15.99	0.00350506	-0.130466	0.163862	0
17613	6.232	241.112	0.152	5.18	0.00351386	-0.130432	0.164152	0
5698	0.934	139.532	0.411	5.43	0.00351841	-0.130414	0.164243	0
22797	5.583	282.204	0.058	8.89	0.00352997	-0.130369	0.164567	0
57688	8.452	774.042	0.12	7.86	0.00353309	-0.130356	0.164567	0
7799	0.857	158.154	0.709	17.79	0.00353312	-0.130356	0.164567	1
26186	1.813	311.889	0.108	6.76	0.00354185	0.130322	0.164852	0
60273	9.238	898.55	0.002	7.76	0.00354506	-0.13031	0.16488	0
36774	4.695	414.338	0.128	6.29	0.00354838	-0.130297	0.164914	0
23488	6.227	288.102	0.473	6.29	0.00355296	-0.130279	0.165006	0
58555	8.686	807.865	0.467	4.21	0.00356389	-0.130236	0.165281	0
43117	4.2	487.284	0.978	19.88	0.0035641	0.130236	0.165281	1
39910	7.404	449.357	0.02	5.18	0.00357214	-0.130204	0.165533	0
7062	1.65	152.058	0.028	5.64	0.00359855	-0.130102	0.166572	0
24743	8.795	298.878	0.102	3.19	0.00360163	0.130091	0.166572	0
14560	4.778	216.161	0.613	22.92	0.00360245	-0.130087	0.166572	1
31893	4.678	363.217	0.01	9.49	0.00361631	-0.130034	0.167076	0
26134	4.906	311.199	0.032	3.54	0.00361922	0.130023	0.167076	0
36096	4.73	407.165	0.004	4.55	0.00362127	0.130015	0.167076	0
11536	7.214	190.628	0.501	11	0.00362483	-0.130002	0.167119	0
58278	9.527	796.619	0.064	10.08	0.00363625	-0.129958	0.167476	0
42888	5.897	485.113	0.188	4.93	0.00363785	0.129952	0.167476	0
42806	3.69	484.017	0.036	23.91	0.00365054	-0.129904	0.167938	0
42832	5.747	484.174	0.046	10.35	0.00365815	0.129875	0.168166	0
1532	5.238	96.0434	0.01	2.87	0.00366695	0.129842	0.168449	0
58590	9.439	809.649	0.012	5.97	0.00367024	-0.129829	0.168477	0
6189	1.113	143.959	0.998	29.48	0.00367456	0.129813	0.168554	0
7774	1.696	158.078	0.042	4.27	0.00369069	-0.129752	0.169049	0
14380	5.881	215.095	0.038	2.67	0.00369127	-0.12975	0.169049	0
28285	7.274	330.278	0.188	55	0.00369379	-0.12974	0.169049	0
22734	7.278	281.248	0.663	22.15	0.00369603	-0.129732	0.169049	1
27295	2.218	322.187	0.002	4.98	0.00370331	-0.129705	0.169259	0
59812	8.619	871.025	0.034	6.98	0.00370596	0.129695	0.169259	0
50170	7.227	586.922	0.1	7.45	0.00371079	-0.129677	0.169358	0
31067	4.561	356.075	0.002	5.04	0.00371555	-0.129659	0.169453	0
31813	6.995	362.307	0.002	8.91	0.00371853	-0.129648	0.169467	0
11124	2.032	186.185	0.008	4.85	0.00374066	-0.129565	0.170353	0
1390	2.039	94.0414	0.002	8.73	0.00374636	-0.129544	0.170369	0
32224	7.857	366.314	0.002	13.39	0.00374639	-0.129544	0.170369	0
20167	6.643	261.619	0.365	7.26	0.00375556	0.12951	0.170664	0
22298	7.127	278.246	1	759.57	0.00375847	-0.129499	0.170674	1
25184	7.055	302.247	0.733	255.08	0.00377548	-0.129437	0.171324	1
27588	0.638	325.114	0.998	82.2	0.0037984	0.129352	0.17224	0
14954	4.561	220.098	0.002	4.07	0.00381419	-0.129295	0.172774	0
30518	1.736	351.096	0.008	4.42	0.00381562	-0.129289	0.172774	0
11413	0.712	189.124	0.006	6.35	0.00384447	-0.129185	0.173835	1
19247	4.779	254.108	0.026	4.53	0.00384454	-0.129184	0.173835	0
56574	8.962	731.606	1	12.42	0.00384741	-0.129174	0.173841	0
58554	5.771	807.863	0.008	6.52	0.00386091	-0.129125	0.174284	0
56001	8.461	714.561	0.08	6.56	0.00386272	-0.129119	0.174284	0
46015	0.631	524.096	0.964	19.32	0.00387567	0.129072	0.174744	0
23038	4.118	284.088	0.04	5.12	0.00388701	0.129031	0.175131	0
56322	8.175	723.542	0.998	59.96	0.00389157	-0.129015	0.175212	1
15093	0.631	221.187	0.635	5.91	0.00391633	-0.128926	0.176201	0
25377	6.962	304.655	0.158	37	0.00392699	0.128888	0.176312	0
53444	10.498	647.428	0.02	6.73	0.00392719	0.128888	0.176312	0
43149	6.728	487.785	0.134	3.63	0.00392987	0.128878	0.176312	0
56083	3.097	716.839	0.008	0.61	0.00393035	0.128877	0.176312	0
44479	8.798	503.466	0.006	4.93	0.00393268	-0.128868	0.176312	0
24042	7.223	292.263	0.411	39.01	0.00395104	-0.128803	0.177009	1
13414	1.734	207.045	0.97	11.65	0.00395413	-0.128792	0.177023	1
3613	1.391	120.98	0.313	1.76	0.00395933	0.128774	0.177131	0
57400	6.815	762.964	0.074	6.98	0.00396675	0.128748	0.177298	0
1749	0.6	99.0535	0.004	4.01	0.00397357	0.128724	0.177298	0
31806	8.175	362.268	1	15.06	0.00397762	-0.12871	0.177298	1
42711	7.194	482.906	0.549	13.95	0.00397907	-0.128704	0.177298	0
42852	7.158	484.328	0.074	11.95	0.00397937	0.128703	0.177298	0
52220	7.663	624.096	0.016	5.71	0.00397986	-0.128702	0.177298	0
20959	5.882	267.091	0.072	3.57	0.00398678	-0.128677	0.177482	0
28651	6.821	333.686	0.896	12.31	0.0040027	0.128622	0.178065	0
45336	8.981	515.351	0.006	17.23	0.00401003	-0.128596	0.178266	0
43490	7.595	492.212	0.06	7.27	0.00401935	-0.128564	0.1785	0
58653	9.056	812.068	0.236	6.36	0.00402092	-0.128558	0.1785	0
20059	8.784	260.949	0.002	2.99	0.00403328	0.128515	0.178847	0
33904	8.473	383.249	0.986	4.07	0.00403633	-0.128505	0.178847	0
21216	0.864	269.088	0.309	36.49	0.00403721	-0.128502	0.178847	1
58614	9.794	810.6	0.028	10.35	0.00404606	-0.128471	0.179089	0
41543	6.596	468.442	0.537	11.22	0.00404832	-0.128463	0.179089	0
24088	1.736	293.055	0.884	8.28	0.00406296	-0.128413	0.179612	1
54112	6.65	664.164	0.002	0.59	0.00406988	0.128389	0.179652	0
7888	6.229	159.031	0.002	1.21	0.00407483	-0.128372	0.179652	0
55154	7.142	690.364	0.07	9.67	0.00407604	0.128368	0.179652	0
40918	4.861	461.159	0.004	5.94	0.00407749	0.128363	0.179652	0
17739	3.736	242.048	0.004	4.48	0.00407804	-0.128361	0.179652	0
25828	6.814	308.614	0.888	8.38	0.00408265	0.128345	0.17973	0
44170	6.767	500.278	0.405	25.7	0.00409749	0.128294	0.180202	1
63370	9.058	1196.86	0.174	17.28	0.00409905	-0.128289	0.180202	0
54173	7.387	664.588	0.994	98.59	0.00412556	-0.128198	0.181242	1
20765	7.197	265.253	0.267	23.19	0.00412982	-0.128184	0.181303	1
47893	0.578	549.914	0.176	7.14	0.00413374	-0.128171	0.18135	0
27864	5.288	327.204	0.635	10.43	0.00415847	0.128087	0.182108	0
2915	1.251	113.963	0.002	20.14	0.0041608	0.128079	0.182108	0
8223	1.316	161.981	0.603	39.17	0.00416173	0.128076	0.182108	0
41342	0.623	465.952	0.01	3.61	0.00416251	-0.128073	0.182108	0
18130	7.046	245.227	0.383	16.64	0.00417968	-0.128016	0.182413	0
38288	7.394	431.389	0.232	13.83	0.00418129	-0.12801	0.182413	0
44571	5.727	505.154	0.126	9.44	0.00418524	0.127997	0.182413	0
17915	4.96	243.208	0.018	7.79	0.00418993	-0.127981	0.182413	0
58285	9.055	797.078	0.758	17.04	0.00419254	-0.127972	0.182413	0
18029	10.978	244.904	0.455	16.21	0.00419485	-0.127965	0.182413	0
48187	8.796	553.462	0.03	6.76	0.00419706	0.127957	0.182413	0
8965	0.815	168.98	0.301	3.45	0.00419732	0.127956	0.182413	0
53313	6.189	645.192	0.076	5.13	0.00419829	0.127953	0.182413	0
20507	1.682	263.901	0.03	1.18	0.00420013	0.127947	0.182413	0
13028	0.654	203.755	0.255	4.1	0.00420139	0.127943	0.182413	0
25559	3.452	306.045	0.006	6.38	0.00420403	-0.127934	0.182413	0
18420	2.601	247.145	0.964	179.2	0.00420802	-0.127921	0.182462	1
60855	6.63	937.317	0.002	2.46	0.00423233	0.12784	0.183391	0
59624	8.823	859.038	0.022	6.8	0.00424415	-0.127801	0.183777	0
24461	6.57	296.26	0.493	114.33	0.00426324	-0.127737	0.184357	0
12714	5.316	201.022	0.002	4.72	0.00426337	-0.127737	0.184357	0
47341	0.629	542.061	0.379	2.67	0.00426986	0.127716	0.184512	0
39305	8.502	443.184	0.044	5.6	0.00430166	0.127611	0.185759	0
9143	2.184	170.045	0.014	4.5	0.0043111	-0.12758	0.18604	0
39148	8.799	441.299	0.497	6.1	0.00432531	0.127534	0.186527	0
61841	7.52	1020.78	0.062	12.87	0.0043334	-0.127508	0.186749	0
36348	5.596	410.29	0.004	7.62	0.00434255	-0.127478	0.187016	0
24706	1.571	298.87	0.018	2.92	0.00434693	0.127464	0.187077	0
46653	6.817	533.28	0.012	6.38	0.00435385	0.127441	0.187166	0
41878	8.355	472.945	0.006	19.88	0.00435491	-0.127438	0.187166	0
20254	5.882	262.088	1	8.88	0.0043628	-0.127412	0.187379	1
54626	7.711	676.535	0.066	24.31	0.00437977	-0.127358	0.18798	0
40254	6.717	453.213	0.014	4.89	0.00438437	-0.127343	0.18805	0
1410	1.669	94.0652	0.018	4.41	0.00438778	0.127332	0.188069	0
28184	2.744	329.862	0.002	2.1	0.00439283	0.127316	0.188086	0
2644	6.662	109.101	0.002	13.58	0.00439471	-0.12731	0.188086	0
24649	1.96	298.115	0.894	4.7	0.00439708	-0.127302	0.188086	1
58600	8.874	810.057	0.301	9.09	0.00440294	-0.127283	0.18821	0
8527	2.568	163.977	0.445	4.97	0.00441387	0.127248	0.188522	0
40320	4.792	454.118	0.004	14.17	0.00441618	0.127241	0.188522	0
45031	6.579	511.168	0.002	8.69	0.00442298	0.127219	0.188685	0
31113	4.361	356.279	0.002	4.65	0.00443298	0.127187	0.188985	0
19683	5.313	257.223	0.182	15	0.0044473	-0.127142	0.189466	0
6679	0.86	148.043	0.004	643.42	0.00445026	0.127132	0.189466	1
29032	7.478	337.26	0.068	12.74	0.0044559	-0.127114	0.189487	1
21483	6.838	271.159	0.711	11.44	0.00445701	-0.127111	0.189487	1
8512	1.31	163.977	0.84	59.32	0.00445971	0.127102	0.189487	0
5536	0.81	138.951	0.072	2.82	0.00446507	0.127085	0.189588	0
50661	7.503	595.496	0.034	8.64	0.00447631	-0.12705	0.18987	0
58721	8.922	814.569	0.138	16.16	0.00447772	-0.127045	0.18987	0
23244	1.734	285.981	0.982	12.46	0.00450823	-0.126949	0.190923	0
56173	7.447	720.081	0.291	6.34	0.00451025	-0.126943	0.190923	0
56289	7.201	722.566	0.108	9.34	0.00451158	-0.126939	0.190923	0
23021	2.609	284.001	0.01	3.09	0.00452124	-0.126909	0.191204	0
23369	3.731	287.046	0.002	10.94	0.00452478	-0.126898	0.191226	0
47113	7.296	538.442	0.002	11.09	0.00453618	-0.126862	0.19158	0
15165	0.631	222.113	0.01	2.01	0.00454223	0.126843	0.191708	0
36058	8.884	406.749	0.002	4.9	0.0045589	-0.126791	0.192166	0
6422	1.42	146.002	0.002	1.44	0.0045592	-0.12679	0.192166	0
30685	0.633	352.584	0.569	29.61	0.00456217	0.126781	0.192166	0
8947	1.577	168.52	0.19	2.05	0.00456882	-0.12676	0.192318	0
8516	2.991	163.977	0.07	12.62	0.00457396	0.126745	0.192389	0
19464	6.821	255.233	0.369	15.65	0.00457684	-0.126736	0.192389	1
14991	8.793	220.935	0.341	3.32	0.0045811	0.126722	0.192389	0
12875	4.894	202.181	0.078	10.71	0.00458264	-0.126718	0.192389	0
30963	0.631	355.032	0.289	3.36	0.00458977	0.126696	0.192561	0
45786	7.603	520.435	0.271	7.26	0.0045975	-0.126672	0.192758	0
55163	7.456	690.601	0.529	17.38	0.00460513	-0.126648	0.19284	0
18706	8.771	249.184	0.002	1.34	0.00460738	0.126641	0.19284	0
56132	8.924	718.575	0.681	5.86	0.00460868	-0.126637	0.19284	0
20406	5.72	263.057	0.994	242.17	0.00461162	-0.126628	0.19284	1
20854	5.52	266.174	0.92	7.99	0.00463268	-0.126564	0.19352	1
22033	6.196	276.222	0.034	11.66	0.00463412	-0.126559	0.19352	0
58639	8.464	811.508	0.044	6.08	0.00463705	-0.12655	0.19352	0
32934	9.578	373.248	0.002	8.99	0.00465126	0.126507	0.193842	0
31670	2.898	361.176	0.002	18.83	0.00465451	-0.126497	0.193842	0
23757	7.388	290.303	0.156	10.41	0.0046547	-0.126496	0.193842	0
20235	1.735	262.014	0.511	8.85	0.00465701	-0.126489	0.193842	1
43853	6.256	496.34	0.004	7.61	0.00466286	-0.126472	0.193959	0
25116	7.142	301.65	0.062	18.79	0.00466869	0.126454	0.194074	0
34817	7.733	392.807	0.283	3.58	0.00467634	0.126431	0.194264	0
42518	6.697	480.308	0.006	30.4	0.00468373	0.126408	0.194444	0
36388	9.078	410.763	0.006	7.98	0.00469078	-0.126387	0.19452	0
31596	5.336	360.275	0.301	4.37	0.00469183	-0.126384	0.19452	0
45848	7.409	521.423	0.054	7.5	0.00469477	-0.126375	0.19452	0
17099	0.866	237.086	0.028	3.84	0.00473176	-0.126263	0.195749	0
17976	3.554	244.155	0.014	4.06	0.00473204	-0.126263	0.195749	0
13773	5.105	210.979	0.002	1.32	0.0047337	-0.126258	0.195749	0
37041	8.903	417.771	0.597	11.53	0.00474973	-0.126209	0.196198	0
26178	6.884	311.634	1	39.2	0.00475075	0.126206	0.196198	0
44533	8.765	504.345	0.182	5.7	0.00476634	-0.12616	0.196437	0
27302	2.514	322.196	0.006	2.85	0.00476804	-0.126155	0.196437	0
16098	1.716	229.928	0.024	2.76	0.00476864	-0.126153	0.196437	0
23115	2.676	284.993	0.044	3.11	0.00476893	-0.126152	0.196437	0
33809	8.17	382.239	0.002	7.24	0.00478336	-0.126109	0.196873	0
33404	2.602	378.087	0.088	4.04	0.00478572	-0.126102	0.196873	0
45812	4.927	521.131	0.042	53.6	0.0047964	0.12607	0.197184	0
15964	5.396	228.197	0.014	6.01	0.00480523	-0.126044	0.197419	0
16667	0.63	233.983	0.952	13.7	0.0048324	0.125964	0.198407	0
8410	0.641	163.061	0.064	2.94	0.00485724	0.125891	0.199298	1
60144	9.236	890.546	0.072	7.02	0.00486158	-0.125878	0.199347	0
17204	0.62	238.037	0.164	5.3	0.00486627	-0.125865	0.199364	0
13036	1.734	203.972	0.996	20.4	0.00486828	-0.125859	0.199364	0
23240	1.696	285.98	0.004	9.12	0.00488161	-0.12582	0.199781	0
23410	4.531	287.197	0.056	4.02	0.00488908	0.125798	0.19994	0
23904	7.274	291.269	0.036	10.13	0.00489181	-0.12579	0.19994	0
45459	5.473	517.139	0.002	6.76	0.00489755	0.125773	0.200046	0
47237	6.799	540.427	0.184	38.88	0.00491215	-0.125731	0.200513	0
38387	5.157	432.542	0.257	2.47	0.00492216	-0.125702	0.200792	0
24941	6.923	300.231	0.188	86.82	0.0049308	-0.125677	0.201015	0
24244	2.288	294.696	0.052	7.15	0.00494068	-0.125648	0.201186	0
38311	9.41	431.785	0.002	5.34	0.00494135	0.125646	0.201186	0
38664	5.808	435.333	0.389	8.88	0.00494599	0.125633	0.201246	0
59117	8.558	833.542	0.028	17.88	0.00495726	0.1256	0.201575	0
28131	4.877	329.212	0.014	4.76	0.0049622	0.125586	0.201647	0
27659	7.202	325.757	0.695	47.93	0.00496787	-0.12557	0.201748	0
18448	2.59	247.735	0.162	1.77	0.00498386	-0.125524	0.202268	0
29556	5.326	343.016	0.002	8.31	0.00498834	-0.125511	0.20232	0
13033	1.579	203.972	0.024	11.43	0.00499895	-0.125481	0.20262	1
55450	4.727	699.225	0.022	16.13	0.0050033	-0.125468	0.202667	0
27124	7.198	320.236	0.016	49.84	0.00500724	-0.125457	0.202697	0
58150	8.161	792.537	0.004	9.4	0.00501154	-0.125445	0.202742	0
46766	6.198	534.317	0.495	18.8	0.00501959	-0.125422	0.202938	1
54417	7.139	670.492	0.082	6.98	0.00502588	-0.125404	0.203063	0
41599	5.596	469.204	0.004	34.74	0.00503069	-0.12539	0.203128	0
16964	1.734	235.998	0.998	24.91	0.00503926	-0.125366	0.203344	1
59532	8.69	854.54	0.078	9.21	0.0050548	0.125322	0.203738	0
18491	1.001	247.998	0.259	10.27	0.0050561	-0.125318	0.203738	0
3599	1.795	120.979	0.028	3.64	0.00505865	0.125311	0.203738	0
51953	0.857	619.079	0.892	3.19	0.00506929	-0.125281	0.204036	0
8199	9.065	161.131	0.052	4.48	0.00507779	-0.125257	0.204249	0
63358	9.041	1195.35	0.01	5.54	0.00508141	-0.125247	0.204265	0
35342	9.101	398.187	0.014	0.43	0.00509522	0.125208	0.204637	0
5453	1.146	137.361	0.016	23.11	0.00509747	0.125202	0.204637	0
34113	7.379	385.235	0.004	17.3	0.00510035	-0.125194	0.204637	0
59905	10.007	875.707	0.002	9.04	0.0051402	-0.125082	0.206083	0
24464	7.319	296.296	0.541	103.92	0.00514826	-0.12506	0.206083	0
24727	9.321	298.877	0.032	3.21	0.00514867	0.125059	0.206083	0
23497	5.33	288.144	0.012	4.08	0.00514995	-0.125055	0.206083	0
57398	0.575	762.865	0.182	36.48	0.00515264	-0.125048	0.206083	0
25611	7.388	306.278	1	232.26	0.00516268	-0.12502	0.206337	1
28359	2.148	331.144	0.14	9.6	0.00516677	-0.125008	0.206337	0
28900	4.887	336.168	0.004	5	0.00517368	-0.124989	0.206337	0
22544	7.736	280.198	0.275	4.61	0.00517517	0.124985	0.206337	0
3919	3.299	123.117	0.022	6.21	0.00517565	0.124984	0.206337	0
8224	1.387	161.981	0.052	6.14	0.00518115	0.124968	0.206337	0
21960	2.34	275.497	0.006	54.19	0.00518503	-0.124958	0.206337	0
24236	6.89	294.244	0.126	87.96	0.00519031	-0.124943	0.206337	0
32000	7.832	364.357	0.008	7.98	0.00519243	-0.124937	0.206337	0
38177	5.901	430.296	0.002	8.35	0.00519358	-0.124934	0.206337	0
30193	7.349	348.291	0.22	21.77	0.00519479	-0.124931	0.206337	1
14913	6.948	219.212	0.285	18.58	0.00521427	-0.124877	0.206981	0
16474	5.399	232.192	0.034	6.31	0.00523689	-0.124815	0.207604	0
46628	5.839	533.208	0.008	7.79	0.00524385	0.124796	0.207604	0
18710	6.697	249.185	0.002	3.44	0.00524606	-0.12479	0.207604	0
10044	6.16	177.127	0.124	4.05	0.00524609	0.12479	0.207604	0
46403	5.305	530.599	0.1	3.38	0.00524636	0.124789	0.207604	0
63052	5.489	1157.88	0.082	1.83	0.00525042	-0.124778	0.207608	0
16548	1.736	233.061	0.068	4.53	0.00525511	-0.124765	0.207608	0
43378	6.156	490.353	0.533	9.54	0.00525667	-0.124761	0.207608	0
29907	0.616	346.122	0.094	1.98	0.00525956	0.124753	0.207608	0
29536	6.82	342.674	0.234	7.05	0.00526333	0.124743	0.207628	0
61979	9.046	1034.09	0.106	8.17	0.00527629	-0.124707	0.207954	0
41397	6.712	466.35	0.008	8.64	0.00527901	0.1247	0.207954	0
7441	1.063	155.131	0.006	0.27	0.00528516	-0.124683	0.207954	0
6303	5.299	144.982	0.034	1.16	0.0052912	-0.124667	0.207954	0
21231	2.6	269.127	0.208	4.53	0.00529251	-0.124663	0.207954	0
31581	2.336	360.202	0.126	5.59	0.00529543	-0.124655	0.207954	0
11125	0.863	186.185	0.383	36.53	0.00529982	-0.124643	0.207954	0
40056	0.635	451.03	0.892	6.71	0.00530405	0.124632	0.207954	0
26870	7.198	317.766	0.339	8.49	0.00530572	-0.124627	0.207954	0
16121	0.632	229.988	0.078	5.34	0.00530722	0.124623	0.207954	0
15442	0.835	224.129	0.289	4.84	0.00530958	0.124617	0.207954	0
28358	1.86	331.144	0.14	10.18	0.00531096	-0.124613	0.207954	0
23231	2.54	285.693	0.052	8.24	0.00531836	-0.124593	0.208079	0
23446	6.199	287.633	0.545	8.08	0.00532071	-0.124587	0.208079	0
14139	8.432	213.147	0.01	1.35	0.0053387	0.124538	0.208654	0
14340	0.627	215.013	0.002	2.05	0.00534682	0.124517	0.208662	0
59903	9.156	875.56	0.236	9.87	0.00534988	-0.124508	0.208662	0
38972	0.85	439.33	0.028	11.89	0.00535203	-0.124503	0.208662	0
10229	1.733	179.05	0.675	6.34	0.00535286	-0.1245	0.208662	1
60140	8.565	890.521	0.954	40.48	0.00535538	0.124494	0.208662	0
8518	1.283	163.977	0.102	53.15	0.00536172	0.124477	0.208706	0
25664	4.562	307.051	0.036	4.3	0.00536308	-0.124473	0.208706	0
40240	5.806	453.194	0.002	24.59	0.00537355	0.124445	0.208985	0
53560	7.947	649.514	0.04	2.04	0.00538914	-0.124403	0.209278	0
47112	7.73	538.437	0.22	14.61	0.00539085	-0.124399	0.209278	0
63019	2.127	1153.63	0.086	13.67	0.005391	0.124398	0.209278	0
37467	8.733	422.76	0.004	8.52	0.00541361	0.124338	0.210028	0
8622	0.714	165.076	0.148	4.21	0.00543306	-0.124286	0.21051	1
54226	7.188	666.02	0.068	11.07	0.00543317	-0.124286	0.21051	0
19694	7.149	257.304	0.002	0.64	0.00543601	0.124278	0.21051	0
26943	7.318	318.278	0.405	43.55	0.00544786	-0.124247	0.21071	0
12350	0.629	197.961	0.926	22.55	0.00544968	0.124242	0.21071	0
26056	7.441	310.311	0.976	861.32	0.00545115	-0.124238	0.21071	1
22774	3.629	282.109	0.018	8.65	0.00545621	-0.124225	0.210777	0
36919	4.339	416.301	0.01	4.58	0.00546702	0.124196	0.211066	0
15128	1.735	222.019	0.944	9.59	0.00547353	-0.124179	0.211189	1
32158	0.852	365.993	0.192	3.52	0.00549356	-0.124127	0.211722	0
17357	4.844	239.058	0.01	2.81	0.00549402	-0.124125	0.211722	0
24696	6.776	298.628	0.307	23.66	0.0055032	0.124101	0.211897	0
30444	3.149	350.778	0.006	17.56	0.00550525	-0.124096	0.211897	0
50063	6.263	585.243	0.004	10.21	0.00554099	0.124003	0.213076	0
45647	4.813	519.194	0.006	4.39	0.00554486	0.123993	0.213076	0
28914	6.705	336.248	0.078	35.14	0.00554846	-0.123983	0.213076	0
19639	6.231	257.086	0.004	4.03	0.00555218	-0.123974	0.213076	0
15612	1.649	225.943	0.004	3.22	0.00555269	0.123972	0.213076	0
61258	7.515	964.711	0.014	5.91	0.00556004	-0.123953	0.213229	0
19153	0.594	253.214	0.008	6.21	0.00556693	-0.123935	0.213284	0
49884	4.944	582.255	0.012	7.49	0.00556821	-0.123932	0.213284	0
10703	1.887	183.113	0.046	3.97	0.00557762	-0.123908	0.213516	0
24918	2.761	300.2	0.004	8.99	0.00558352	-0.123892	0.213564	0
42915	5.74	485.187	0.15	10.47	0.00558761	0.123882	0.213564	0
22777	2.275	282.12	0.148	8.81	0.005589	-0.123878	0.213564	0
546	6.262	80.0493	0.006	1.43	0.00560007	0.12385	0.21375	0
47361	6.768	542.326	0.76	184.93	0.00560197	0.123845	0.21375	3
14527	2.789	216.069	0.004	7.63	0.0056062	-0.123834	0.21375	0
63371	5.509	1197.18	0.05	1.79	0.00560735	-0.123831	0.21375	0
5981	2.405	142.086	0.048	7.56	0.0056197	-0.123799	0.214092	0
30386	3.007	350.119	0.056	3124.71	0.00564057	-0.123745	0.214758	0
47116	7.124	538.468	0.407	13.71	0.00564686	-0.123729	0.214869	0
54247	7.707	666.578	0.222	12.39	0.00566139	-0.123692	0.215116	0
8265	2.248	161.982	0.002	7.66	0.0056671	0.123678	0.215116	0
2635	6.944	109.101	0.078	7	0.00566711	-0.123677	0.215116	0
40994	3.853	462.107	0.024	3.43	0.00566732	-0.123677	0.215116	0
35603	2.628	401.199	0.002	3.36	0.00567033	-0.123669	0.215116	0
20562	3.728	264.028	0.016	3.48	0.00568757	-0.123625	0.21559	0
53222	4.884	643.059	0.004	4.97	0.00569248	0.123613	0.21559	0
4418	3.088	128.107	0.124	19.02	0.00569302	-0.123611	0.21559	0
4886	5.252	132.102	0.006	3.7	0.00569683	-0.123602	0.215605	0
18314	8.794	246.943	0.677	3.37	0.00571021	0.123568	0.215983	0
40403	4.166	455.155	0.006	9.72	0.00571808	0.123548	0.216086	0
1294	0.911	91.5092	0.994	1145.25	0.00571976	0.123544	0.216086	0
18539	2.991	248.165	0.002	11.04	0.00572399	-0.123533	0.216117	0
15094	5.081	221.191	0.002	6.91	0.00572819	0.123522	0.216147	0
20681	0.629	265.024	0.411	17.12	0.00574031	0.123492	0.216476	0
45913	6.511	522.401	0.016	18.62	0.00575603	-0.123452	0.216939	0
55174	7.38	691.1	0.449	6.39	0.00576182	-0.123438	0.217017	0
49665	6.817	578.278	0.972	17.43	0.00576811	0.123422	0.217017	0
15659	0.864	226.03	0.228	2.18	0.00576836	-0.123421	0.217017	0
33396	2.719	378.007	0.034	4.38	0.00578894	-0.123369	0.217662	0
10336	0.754	180.087	0.068	7.61	0.00579882	0.123345	0.217904	0
29435	7.21	341.353	0.944	83.12	0.0058201	-0.123292	0.218575	1
21694	0.631	273.079	0.094	2.47	0.00584773	0.123223	0.219482	0
1595	0.643	97.0281	1	21.52	0.00585583	0.123203	0.219534	1
38625	0.636	435.058	0.862	13.13	0.00585604	0.123202	0.219534	0
57987	8.176	785.512	0.952	10.23	0.00587043	-0.123167	0.219669	0
17917	9.062	243.21	0.99	10.39	0.00587325	-0.12316	0.219669	0
20948	5.286	267.055	0.002	2.66	0.0058736	-0.123159	0.219669	0
18566	2.584	248.616	0.142	4.35	0.00587856	-0.123147	0.219669	0
30436	7.833	350.342	0.108	12.72	0.00587989	-0.123143	0.219669	0
7718	0.871	157.342	0.064	1.14	0.00588153	-0.123139	0.219669	0
4986	8.063	133.035	0.014	2.12	0.0058839	0.123133	0.219669	0
24077	2.871	293.027	0.036	8.83	0.00589332	-0.12311	0.219891	0
40962	7.841	461.365	0.03	37.8	0.0059003	-0.123093	0.220022	0
63357	8.63	1195.33	0.505	52.49	0.00590677	-0.123077	0.220134	0
9647	0.738	174.076	0.008	6.36	0.00591239	0.123063	0.220214	0
17150	6.794	237.185	0.06	5.34	0.00592061	-0.123043	0.220275	0
14829	1.266	218.983	0.014	2.66	0.00592097	0.123042	0.220275	0
25268	3.554	303.227	0.052	7.6	0.00592671	-0.123028	0.220359	0
40629	6.211	457.293	0.008	6.56	0.00593095	0.123018	0.220387	0
36635	2.926	413.142	0.441	5.61	0.00594415	-0.122985	0.220748	0
28732	7.681	334.31	0.82	24.57	0.00595594	-0.122957	0.221007	1
63186	9.046	1174.36	0.224	7.22	0.0059581	-0.122951	0.221007	0
17675	1.672	241.954	0.232	3.82	0.00597443	0.122912	0.221484	0
21835	7.108	274.656	0.814	69.07	0.0059931	0.122866	0.222042	0
3885	0.863	123.055	1	30.16	0.00599687	-0.122857	0.222042	1
17662	3.064	241.954	0.004	4.49	0.00600001	0.122849	0.222042	0
5241	0.86	135.269	0.156	0.95	0.00600888	0.122828	0.222241	0
28339	2.336	331.093	0.04	4.84	0.00602596	0.122787	0.222743	0
28254	2.907	330.167	0.176	3.25	0.00603316	-0.122769	0.222879	0
43004	5.081	486.154	0.002	10.93	0.00603847	0.122756	0.222945	0
25361	7.206	304.263	0.926	894.65	0.00604359	-0.122744	0.223004	1
18331	8.937	246.943	0.06	3.03	0.00605534	0.122716	0.223026	0
11916	1.735	194.024	0.19	16.86	0.00605623	-0.122714	0.223026	0
58860	8.561	821.047	0.661	7.98	0.00606777	-0.122686	0.223026	0
10137	2.358	177.996	0.032	12.34	0.00606798	-0.122685	0.223026	0
11915	1.411	194.022	0.002	11.01	0.00606979	-0.122681	0.223026	0
20492	7.277	263.238	0.545	18.27	0.00607081	-0.122679	0.223026	0
37023	7.013	417.337	0.786	18.67	0.00607263	-0.122674	0.223026	0
7216	3.445	153.128	0.465	12.35	0.00607377	0.122672	0.223026	1
12656	4.843	200.165	0.13	7.72	0.00608053	-0.122655	0.223026	0
21815	3.689	274.201	0.188	3.32	0.00608301	0.122649	0.223026	0
28416	6.329	331.332	0.2	20.04	0.00608503	-0.122645	0.223026	0
17251	5.318	238.181	0.178	12.28	0.0060925	-0.122627	0.223026	0
34077	0.633	385.096	0.792	39.02	0.00609408	0.122623	0.223026	1
11243	6.943	187.134	0.044	4.58	0.00609507	-0.122621	0.223026	0
21380	6.273	270.244	0.347	52.95	0.00609927	-0.122611	0.223026	0
12147	1.724	196.003	0.006	3.51	0.00610341	0.122601	0.223026	0
45054	7.495	511.256	0.729	11.95	0.00610398	0.122599	0.223026	0
35501	9.648	399.772	0.004	5.81	0.00611009	-0.122585	0.22312	0
21355	0.632	270.119	0.988	58.28	0.00612455	0.12255	0.223454	0
54440	7.25	671.433	0.002	9.89	0.00612626	-0.122546	0.223454	0
47139	0.63	539.058	0.725	6.63	0.00613855	0.122517	0.223773	0
42992	5.248	486.099	0.016	7.99	0.00614631	0.122499	0.223912	0
25827	7.283	308.296	0.689	64.39	0.00615404	-0.12248	0.223912	0
27301	2.328	322.195	0.036	3.42	0.0061579	-0.122471	0.223912	0
8222	0.812	161.981	0.996	20.49	0.00615974	0.122467	0.223912	1
29053	2.097	337.638	0.04	4.21	0.00616002	-0.122466	0.223912	0
40105	5.389	451.305	0.038	11.11	0.00616765	-0.122448	0.223989	0
23826	0.634	291.084	0.084	11.32	0.0061692	0.122444	0.223989	0
54344	7.193	669.02	0.088	4.99	0.00617515	-0.12243	0.224076	0
47236	6.764	540.426	0.182	44.57	0.00618857	-0.122399	0.224242	0
23969	0.633	292.008	0.667	3.08	0.00619181	0.122391	0.224242	0
52088	2.273	621.35	0.022	5.2	0.00619529	-0.122383	0.224242	0
32622	4.935	370.089	0.03	11.8	0.0061969	0.122379	0.224242	0
57607	9.153	770.603	0.004	20.72	0.0062002	-0.122371	0.224242	0
59998	8.608	881.519	0.383	8.62	0.00620093	0.122369	0.224242	0
31037	6.587	355.333	0.222	37.18	0.00620901	-0.12235	0.224406	0
504	0.627	76.0394	0.822	38.79	0.00622176	0.12232	0.224738	0
63119	8.612	1166.34	0.138	3.94	0.00622789	-0.122306	0.224832	0
13588	0.635	209.031	0.012	2.37	0.00625929	0.122233	0.225837	0
32648	8.175	370.258	1	51.35	0.00626389	-0.122222	0.225874	1
50326	7.389	589.566	0.455	20.64	0.00630259	-0.122132	0.226756	0
55528	8.175	701.561	1	196.83	0.00630358	-0.12213	0.226756	1
17455	4.738	240.004	0.02	0.64	0.00630365	-0.122129	0.226756	0
43321	7.23	489.401	0.02	11.27	0.00630623	-0.122123	0.226756	0
44396	4.532	503.165	0.004	3.23	0.00630624	0.122123	0.226756	0
27462	3.19	323.534	0.044	10.1	0.00631722	-0.122098	0.227023	0
30232	10.935	349.004	0.062	2.16	0.00632208	-0.122087	0.227061	0
14853	8.498	219.054	0.002	2.99	0.00632546	0.122079	0.227061	0
9684	1.836	174.15	0.004	3.34	0.00633341	-0.12206	0.227218	0
51603	7.193	612.556	0.747	20.51	0.00633993	-0.122045	0.227291	0
34997	6.947	394.269	0.303	16.03	0.00634621	-0.122031	0.227291	0
22361	1.391	279.039	0.002	0.45	0.00634787	-0.122027	0.227291	0
1544	0.45	96.0442	0.094	2.94	0.0063498	0.122023	0.227291	0
63086	3.014	1162.34	0.002	1.02	0.00636863	-0.121979	0.227836	0
19772	6.092	258.28	0.002	18.89	0.00637222	-0.121971	0.227836	0
42913	5.712	485.184	0.044	8.73	0.00639364	0.121922	0.228473	0
27565	5.718	325.028	0.876	101.07	0.0064056	-0.121895	0.228772	1
31989	8.458	364.275	0.004	3.95	0.00641032	-0.121884	0.228812	0
45231	5.853	514.133	0.285	24.22	0.00642546	0.121849	0.229128	0
12352	1.737	197.975	0.02	4.06	0.00642642	-0.121847	0.229128	0
45486	4.831	517.273	0.002	6.66	0.00644283	-0.12181	0.229584	0
24675	5.952	298.239	0.004	3.25	0.00649885	-0.121683	0.23145	0
59027	8.445	828.55	0.307	22.06	0.00650524	-0.121668	0.231548	0
11083	3.885	186.053	0.052	6.47	0.00651384	0.121649	0.231724	0
26191	1.697	311.89	0.028	2.11	0.0065226	0.121629	0.231905	0
52766	0.572	634.379	0.04	3.33	0.0065318	-0.121609	0.232102	0
51768	5.141	615.406	0.048	0.92	0.00653595	0.121599	0.23212	0
56362	8.172	724.544	0.727	26.12	0.00654899	-0.12157	0.232452	0
50941	6.889	600.469	0.014	15.26	0.00655891	-0.121548	0.232674	0
34153	8.079	385.348	0.339	16.21	0.00656394	-0.121536	0.232721	0
3148	5.31	116.144	0.006	1	0.00657685	-0.121508	0.232721	0
58624	8.722	811.041	0.074	11.61	0.00658008	-0.1215	0.232721	0
45490	0.801	517.281	0.002	4.57	0.00658082	-0.121499	0.232721	0
37710	6.173	425.269	0.2	19.57	0.00658134	0.121498	0.232721	1
19239	3.439	254.066	0.016	4.13	0.00658373	-0.121492	0.232721	0
48741	7.203	563.554	0.721	2821.67	0.00658729	-0.121484	0.232721	1
38819	7.282	437.303	0.07	3.49	0.00658959	-0.121479	0.232721	0
20613	6.96	264.231	0.441	60.22	0.00659809	-0.12146	0.232891	0
23466	0.852	287.992	0.058	4.52	0.00660771	-0.121439	0.232991	0
22250	4.562	278.033	0.098	6.03	0.00660826	-0.121438	0.232991	0
57233	8.397	756.555	0.681	62.45	0.00661338	-0.121426	0.233015	1
15715	7.197	226.218	0.212	10.44	0.0066163	-0.12142	0.233015	0
30060	5.401	347.206	0.006	7.02	0.00662164	0.121408	0.233074	0
17664	1.629	241.954	0.066	4.96	0.00663736	0.121373	0.233471	0
48349	0.859	556.051	0.812	3.63	0.00664152	-0.121364	0.233471	0
62651	5.431	1107.14	0.04	1.29	0.00664506	0.121356	0.233471	0
44045	7.193	498.882	0.521	9.35	0.00664765	-0.12135	0.233471	0
23988	4.558	292.077	0.092	5.29	0.006659	-0.121325	0.23374	0
23290	4.513	286.166	0.012	3.75	0.00666308	-0.121316	0.233754	2
36636	2.74	413.143	0.433	5.57	0.00667349	-0.121293	0.233989	0
57299	8.515	759.037	0.008	2.14	0.00669446	-0.121247	0.234589	0
32783	1.724	371.883	0.002	11.68	0.006698	0.121239	0.234589	0
32657	5.843	370.296	0.998	29.16	0.00670436	-0.121225	0.234682	1
15320	6.788	223.169	0.038	2.78	0.00671441	-0.121203	0.234904	0
42000	3.145	474.234	0.234	10.73	0.00673553	-0.121157	0.235513	0
33671	5.968	381.098	0.078	3.77	0.0067562	0.121112	0.236063	0
30230	10.98	349.001	0.144	3.86	0.00675871	-0.121106	0.236063	0
1841	2.249	100.112	0.739	13.64	0.00678033	0.121059	0.236579	0
18163	2.729	245.984	0.044	1.95	0.00678095	0.121058	0.236579	0
27750	5.675	326.343	0.002	15.41	0.00679168	-0.121035	0.236823	0
12723	2.801	201.044	0.086	18.79	0.00681015	-0.120995	0.237337	0
41855	7.026	472.363	0.002	29.61	0.00682151	-0.12097	0.237474	0
10949	8.794	185.115	0.365	3.1	0.00682157	0.12097	0.237474	0
23691	4.922	290.025	0.008	2.34	0.0068404	0.120929	0.237974	0
6332	0.642	145.05	0.992	10.93	0.00684391	0.120922	0.237974	1
59552	8.463	855.518	0.074	8.19	0.00684721	-0.120915	0.237974	0
23764	6.767	290.64	0.359	109.49	0.00686375	0.120879	0.238308	0
28164	6.326	329.318	0.016	21.66	0.00686712	-0.120872	0.238308	0
35969	6.847	405.273	0.072	8.49	0.0068716	-0.120862	0.238308	0
9203	4.778	170.154	0.096	7.64	0.00687186	-0.120862	0.238308	0
9665	3.089	174.113	0.172	47.85	0.00688714	-0.120829	0.238708	1
53952	0.576	660.381	0.118	4.93	0.00689746	-0.120807	0.238863	0
10985	2.462	185.129	0.998	9.14	0.00689916	-0.120803	0.238863	1
43396	9.261	490.744	0.034	3.86	0.00691039	-0.120779	0.238927	0
217	1.862	62.0598	0.042	7.76	0.00691405	-0.120771	0.238927	0
16586	0.714	233.125	0.014	2.31	0.00691611	-0.120767	0.238927	0
15552	5.288	225.111	0.082	105.16	0.00692099	-0.120757	0.238927	1
12664	5.486	200.238	1	21.8	0.00692664	-0.120745	0.238927	0
9344	0.722	171.149	0.022	2.1	0.00692747	-0.120743	0.238927	0
5480	0.862	138.048	0.008	447.56	0.00692949	-0.120738	0.238927	0
47550	6.829	545.788	0.07	5.75	0.00693115	0.120735	0.238927	0
42664	6.527	482.218	0.002	12.57	0.00694229	0.120711	0.239119	0
25370	6.18	304.591	0.321	114.66	0.00694428	0.120707	0.239119	0
43322	8.839	489.453	1	11.69	0.0069495	-0.120696	0.239169	0
11210	2.994	187.107	0.008	3.66	0.00697385	-0.120644	0.239877	0
36922	6.121	416.334	0.022	7.44	0.00698675	-0.120617	0.240042	0
36201	4.078	408.587	0.004	1.25	0.00699153	0.120607	0.240042	0
26333	7.135	312.749	0.451	30.67	0.00699815	-0.120593	0.240042	0
36788	8.442	414.772	0.238	4.8	0.00700227	-0.120584	0.240042	0
55448	7.38	699.089	0.693	18.12	0.00700312	-0.120582	0.240042	0
52107	10.268	621.443	1	7.76	0.00700417	-0.12058	0.240042	0
38036	3.653	429.166	0.018	106.49	0.00700515	-0.120578	0.240042	0
5416	0.861	137.047	0.994	407.41	0.00701169	-0.120564	0.240045	1
59752	8.864	867.526	0.08	6.18	0.00701281	-0.120562	0.240045	0
6430	2.793	146.06	0.004	8.91	0.00702705	-0.120532	0.240146	0
87	0.661	58.0652	1	32.21	0.00702912	-0.120528	0.240146	1
56830	8.474	741.05	0.369	2.48	0.0070305	-0.120525	0.240146	0
56550	1.765	730.744	0.002	64.33	0.00703291	-0.12052	0.240146	0
59080	8.652	831.532	0.946	11.27	0.00703472	0.120516	0.240146	0
1838	2.197	100.112	0.07	12.61	0.00706185	0.120459	0.240711	0
34093	5.513	385.169	0.244	7.26	0.00706203	0.120458	0.240711	0
30253	5.093	349.109	0.014	7.16	0.00706264	-0.120457	0.240711	0
15140	0.71	222.1	0.425	3.92	0.00708057	-0.12042	0.241192	0
55608	7.446	704.109	0.305	8.18	0.00710097	-0.120377	0.241644	0
47781	8.794	548.503	0.317	6.38	0.00710147	0.120376	0.241644	0
60972	5.264	943.99	0.567	3.74	0.00711119	-0.120356	0.241845	0
21994	3.736	276.074	0.01	6.39	0.00711971	-0.120338	0.241992	0
62276	8.631	1063.41	1	9.76	0.00712313	-0.120331	0.241992	0
15670	3.736	226.077	0.22	10.06	0.00713353	-0.120309	0.242215	0
58345	8.693	799.2	0.062	2.89	0.00714525	-0.120285	0.242483	0
22005	0.866	276.127	0.004	3.36	0.00714962	0.120276	0.242502	0
41387	5.899	466.317	0.365	20.2	0.00716551	-0.120243	0.242831	1
49059	7.896	568.429	0.752	20.16	0.0071696	-0.120235	0.242831	0
57911	8.805	783.068	0.042	22.7	0.00717671	-0.12022	0.242831	0
26507	6.205	314.21	0.01	3.09	0.00717748	-0.120218	0.242831	0
36564	8.697	412.25	0.002	3.69	0.00718214	-0.120209	0.242831	0
21629	9.447	272.907	0.066	0.84	0.00718376	0.120205	0.242831	0
19858	5.97	259.13	0.806	2.63	0.00718856	-0.120195	0.242831	0
22568	7.055	280.266	0.928	856.54	0.00719163	-0.120189	0.242831	1
33128	7.884	375.259	0.002	17.13	0.00719736	-0.120177	0.242831	0
44966	0.631	510.107	0.956	9.9	0.00719859	0.120175	0.242831	0
27129	6.754	320.257	0.439	392.29	0.00720146	-0.120169	0.242831	0
3606	1.315	120.979	0.18	5.65	0.0072107	0.12015	0.243013	0
43064	5.233	487.161	0.006	8.37	0.00721927	0.120132	0.243142	0
57327	6.814	759.957	0.122	5.93	0.00722529	0.12012	0.243142	0
21190	0.627	269.013	0.054	1.48	0.00722934	0.120112	0.243142	0
51595	3.773	612.322	0.615	11.65	0.00723	-0.12011	0.243142	0
14605	2.596	216.912	0.036	2.35	0.0072337	0.120103	0.243142	0
47747	6.254	548.187	0.002	86.38	0.00724262	0.120084	0.243313	0
33757	1.734	381.943	0.18	3.12	0.0072613	-0.120046	0.243811	0
38450	6.458	433.179	0.048	5.71	0.00727067	-0.120027	0.24387	0
54113	6.813	664.223	0.623	9.44	0.00727075	0.120027	0.24387	0
29314	7.242	340.715	0.936	14.19	0.00727954	0.120009	0.244036	0
41535	6.645	468.31	0.174	69.37	0.00728451	0.119999	0.244074	2
57995	7.437	785.597	0.766	19.75	0.00728914	0.119989	0.244099	0
25871	5.718	309.05	0.741	19.71	0.0072995	-0.119968	0.244317	1
38272	6.121	431.315	0.509	14.88	0.0073073	-0.119952	0.244449	1
45958	5.275	523.12	0.038	5.35	0.00731556	0.119936	0.244597	0
30443	3.154	350.757	0.006	12.88	0.00732166	-0.119923	0.244672	0
8284	0.84	161.982	0.006	13.49	0.00734366	0.119879	0.245278	1
29122	4.191	338.646	0.389	7.65	0.00735986	-0.119846	0.245667	0
36057	8.693	406.749	0.395	58.77	0.00736876	-0.119828	0.245667	1
17891	2.568	243.147	0.022	5.22	0.00737092	-0.119824	0.245667	0
56034	8.398	715.573	0.228	3.44	0.00737348	-0.119818	0.245667	0
16651	0.76	233.876	0.994	17.98	0.0073747	0.119816	0.245667	0
58061	9.775	788.618	0.743	34.82	0.00738916	-0.119787	0.245903	1
51886	7.085	617.458	0.004	5.41	0.00738953	-0.119786	0.245903	0
43126	6.157	487.321	0.006	42.85	0.0074067	0.119752	0.246345	0
25509	4.354	305.185	0.076	5.59	0.00741528	0.119734	0.246501	0
6465	2.516	146.118	1	62.28	0.00743752	0.11969	0.246904	1
26273	2.347	312.155	0.002	9.02	0.00743891	-0.119687	0.246904	0
24260	1.818	294.919	0.034	4.79	0.00744303	0.119679	0.246904	0
31919	4.197	363.65	0.842	7.92	0.00744461	-0.119676	0.246904	0
44945	10.14	510.036	0.028	7.99	0.00744687	0.119671	0.246904	0
35520	3.061	400.073	0.004	13.61	0.00747158	-0.119622	0.247593	0
58362	8.554	799.541	0.022	5.63	0.0075005	-0.119564	0.248422	0
45242	7.725	514.256	0.12	10.63	0.00753312	-0.1195	0.249349	0
17129	5.793	237.146	0.391	8.35	0.00753927	-0.119488	0.249349	0
23859	5.988	291.193	0.004	1.48	0.0075403	-0.119486	0.249349	0
28910	4.63	336.217	0.168	5.93	0.0075749	0.119417	0.250363	0
52979	4.087	638.388	0.002	16.46	0.00757964	0.119408	0.250389	0
28402	7.362	331.265	0.172	13.96	0.00758494	-0.119398	0.250433	0
32662	7.125	370.333	0.044	65.48	0.00762357	-0.119322	0.251578	0
6464	2.101	146.118	0.271	19.71	0.00763715	0.119295	0.251895	0
32122	4.796	365.441	0.012	0.88	0.00764127	-0.119287	0.2519	0
63321	9.053	1191.87	0.259	5.7	0.00765738	-0.119256	0.2523	0
28997	0.698	337.161	0.986	12.33	0.00766433	-0.119242	0.25237	1
55497	6.012	700.347	0.028	13.5	0.00766748	0.119236	0.25237	0
16661	1.674	233.916	0.002	6.24	0.00770843	0.119157	0.253586	0
10837	7.044	184.17	0.106	5.37	0.00772496	-0.119125	0.253745	0
12318	7.101	197.12	0.02	2.42	0.00772744	-0.11912	0.253745	0
30908	6.515	354.216	0.002	9.67	0.00772916	-0.119117	0.253745	0
24251	2.658	294.919	0.018	1.76	0.00772927	0.119116	0.253745	0
38106	8.844	429.374	0.998	48.04	0.00773568	-0.119104	0.253824	1
4991	9.195	133.035	0.024	3.35	0.00775269	0.119071	0.254052	0
49178	6.966	570.357	0.251	80.31	0.00775494	0.119067	0.254052	2
21260	5.588	269.21	0.01	5	0.00775734	-0.119062	0.254052	0
21479	0.655	271.138	0.01	2.99	0.00776063	-0.119056	0.254052	0
23089	7.385	284.296	1	322.21	0.00776994	-0.119038	0.254052	1
37715	10.942	425.287	0.192	6.15	0.00777019	-0.119037	0.254052	0
39033	6.002	440.301	0.054	13.82	0.00777067	0.119036	0.254052	0
25931	3.263	309.218	0.05	5.63	0.0077847	0.11901	0.254296	0
44160	4.879	500.159	0.028	6.53	0.00778805	0.119003	0.254296	0
16170	4.779	230.176	0.042	16.44	0.00779117	-0.118997	0.254296	0
56529	8.479	730.032	0.253	3.16	0.00779418	-0.118991	0.254296	0
1842	2.517	100.112	0.988	12.29	0.00780244	0.118975	0.254434	1
45998	7.334	523.435	0.006	8.8	0.00781457	-0.118952	0.254606	0
26800	0.883	317.065	0.85	4.83	0.00781574	-0.11895	0.254606	0
56188	8.683	720.556	0.096	5.31	0.00783359	-0.118916	0.255057	0
11598	6.524	191.086	0.064	4.02	0.0078402	0.118903	0.255141	0
24357	4.823	295.207	0.002	3.06	0.00786064	0.118864	0.255342	0
58800	7.438	818.561	0.858	11.54	0.00786298	0.11886	0.255342	0
46199	7.273	527.198	0.535	6.33	0.00786924	0.118848	0.255342	0
35499	8.454	399.765	0.04	6.14	0.00786958	-0.118847	0.255342	0
26693	4.551	315.959	0.044	2	0.0078702	-0.118846	0.255342	0
13638	5.167	209.118	0.008	9.12	0.00787055	-0.118845	0.255342	1
53314	6.229	645.198	0.082	5.1	0.00787477	0.118837	0.255348	0
5986	6.937	142.123	0.134	7.19	0.00788144	-0.118825	0.255434	0
8752	0.814	166.985	0.156	3.15	0.00788971	0.118809	0.255571	0
2645	6.757	109.101	0.114	9.19	0.0079074	-0.118776	0.255999	0
8523	1.815	163.977	0.052	24.38	0.00791099	0.118769	0.255999	0
28178	3.35	329.861	0.236	4.6	0.00791874	0.118754	0.256119	0
21445	4.475	271.049	0.05	2.54	0.00792463	-0.118743	0.256179	0
48024	7.897	551.423	0.03	10.58	0.0079411	-0.118712	0.256524	0
22841	7.068	282.652	0.683	46.71	0.00794563	0.118703	0.256524	0
35564	8.695	400.762	0.162	6.87	0.00794746	-0.1187	0.256524	0
14895	4.907	219.139	0.014	13.08	0.00796952	-0.118658	0.257105	0
7784	2.904	158.118	0.938	7.45	0.00797619	0.118646	0.257189	1
44140	7.195	499.882	0.319	8.07	0.00798628	-0.118627	0.257357	0
46713	7.126	533.504	0.521	88.91	0.00799208	-0.118616	0.257357	0
37091	8.892	418.272	0.004	5.84	0.00799356	-0.118613	0.257357	0
53966	9.397	660.579	0.012	2.46	0.0080176	0.118568	0.257813	0
17702	2.208	241.955	0.006	4.01	0.00801938	0.118565	0.257813	0
7024	4.594	151.95	0.024	1.12	0.00801992	-0.118564	0.257813	0
37448	5.159	422.288	0.028	7.55	0.00803014	0.118545	0.257848	0
11051	4.787	185.974	0.002	1.04	0.00803198	-0.118541	0.257848	0
58592	9.339	809.651	0.114	14.57	0.00803692	-0.118532	0.257848	0
26641	7.386	315.338	0.565	10.99	0.00803729	-0.118531	0.257848	0
54844	4.198	682.329	0.848	12.66	0.00805558	-0.118497	0.258304	0
15322	6.748	223.169	0.004	1.49	0.00806583	-0.118478	0.258339	0
15427	1.746	224.128	0.012	5.32	0.00806898	-0.118472	0.258339	0
5414	1.143	137.046	0.99	85.54	0.00807184	-0.118467	0.258339	1
33615	8.472	380.255	0.152	11.93	0.00807298	-0.118465	0.258339	0
8074	2.555	160.17	0.19	19.72	0.00808862	0.118436	0.258709	0
29891	6.295	346.053	0.002	166.67	0.0081024	0.11841	0.258873	0
55731	7.695	707.362	0.002	146.27	0.00810785	-0.1184	0.258873	0
11800	1.734	193.001	0.449	5.95	0.00810844	-0.118399	0.258873	0
16106	6.347	229.955	0.164	5.22	0.00811009	0.118396	0.258873	0
17991	5.519	244.192	1	32.4	0.00812276	-0.118373	0.259148	1
30687	4.197	352.66	0.998	93.75	0.0081271	-0.118365	0.259156	0
50171	7.197	586.925	0.152	5.13	0.0081616	-0.118301	0.260066	0
29148	2.792	339.046	0.052	8.82	0.00816793	-0.118289	0.260066	0
54011	9.128	661.538	1	29.77	0.00817095	0.118284	0.260066	1
24249	1.321	294.918	0.032	1.79	0.0081737	0.118279	0.260066	0
23492	5.265	288.111	0.004	13.66	0.00817615	-0.118274	0.260066	0
26029	4.148	310.202	0.002	2.95	0.00818633	0.118255	0.260259	2
30698	5.923	352.988	0.01	1.97	0.00819163	-0.118246	0.260297	0
11846	6.131	193.124	0.002	1.41	0.00820109	0.118228	0.260458	0
47407	6.684	543.269	0.018	3.98	0.00820493	-0.118221	0.260458	0
46455	5.89	531.196	0.074	6.79	0.00821701	0.118199	0.260614	0
63259	9.037	1183.85	0.126	4.86	0.00821804	-0.118197	0.260614	0
[truncated: 61,394 more rows]
